# Supplementary material for: Trajectories of recovery among homeless adults with mental illness who participated in a randomised controlled trial of Housing First: a longitudinal, narrative analysis
Source: PubMed Central journal article supplement — BMJ Open. 2013 Sep 7;3(9):e003442. doi: 10.1136/bmjopen-2013-003442 (PMC3773649; doi:10.1136/bmjopen-2013-003442), 2013-09-07
Supplement: bmjopen-2013-003442.draft_revisions.pdf [file bmjopen-2013-003442.draft_revisions.pdf]

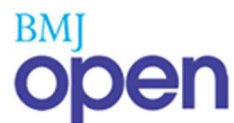

**Trajectories of recovery among homeless adults with mental illness who participated in a randomized controlled trial of Housing First: A longitudinal, narrative analysis**

|                                 |                                                                                                                          |
|---------------------------------|--------------------------------------------------------------------------------------------------------------------------|
| Journal:                        | <i>BMJ Open</i>                                                                                                          |
| Manuscript ID:                  | bmjopen-2013-003442                                                                                                      |
| Article Type:                   | Research                                                                                                                 |
| Date Submitted by the Author:   | 18-Jun-2013                                                                                                              |
| Complete List of Authors:       | Patterson, Michelle; Simon Fraser University, Health Sciences<br>Rezansoff, Stefanie<br>Currie, Lauren<br>Somers, Julian |
| <b>Primary Subject Heading</b>: | Mental health                                                                                                            |
| Secondary Subject Heading:      | Health services research                                                                                                 |
| Keywords:                       | Health policy < HEALTH SERVICES ADMINISTRATION & MANAGEMENT, PUBLIC HEALTH, QUALITATIVE RESEARCH                         |
|                                 |                                                                                                                          |

SCHOLARONE™  
Manuscripts

**MANUSCRIPT COVER PAGE**

**TITLE. Trajectories of recovery among homeless adults with mental illness who participated in a randomized controlled trial of Housing First: A longitudinal, narrative analysis**

**AUTHORS:**

Michelle L. Patterson, PhD (corresponding author)

Adjunct Professor

Simon Fraser University

Faculty of Health Sciences

8888 University Drive, Blusson Hall Rm. 11010

Burnaby, British Columbia

V5A 1S6 Canada

[michelle\\_patterson@sfu.ca](mailto:michelle_patterson@sfu.ca)

Tel.: 778-782-5279

Stefanie Rezanoff, MSc

Simon Fraser University

Lauren Currie, MPH

Simon Fraser University

Julian M. Somers, PhD

Associate Professor

Simon Fraser University

**Key words:** homelessness, mental illness, recovery, qualitative

## ABSTRACT

**Objectives:** This study used longitudinal, narrative data to explore trajectories of recovery among homeless adults with mental illness alongside the factors that contribute to positive, negative, mixed or neutral trajectories over time. We expected that participants who received Housing First (HF) through the study would describe more positive trajectories of recovery than those who were assigned to Treatment as Usual (TAU; no housing or support provided through the study).

**Design:** Narrative interview data was collected from participants at baseline and 18 months after random assignment to HF or TAU.

**Setting:** Participants were sampled from the community in Vancouver, British Columbia.

**Participants:** Fifty-four participants were randomly and purposively selected from the larger trial; 52 were interviewed at baseline and 43 were re-interviewed 18 months after randomization.

**Method:** Semi-structured interviews were conducted at both time points. For each participant, baseline and follow-up narratives were classified as positive, negative, mixed, or neutral trajectories of recovery, and thematic analysis was used to identify the factors underlying different trajectories.

1  
2  
3 **Results:** Participants assigned to HF (n=28) were most likely to describe positive or  
4  
5 mixed trajectories; those assigned to TAU (n=15) tended to describe neutral or negative  
6  
7 trajectories. Positive trajectories were characterized by obtaining good-quality housing,  
8  
9 reduced substance use, efforts to expand social networks, positive expressions of identity,  
10  
11 and the willingness to self-reflect. Negative and neutral trajectories were characterized  
12  
13 by recent eviction, heavy substance use and/or recent relapse, perceived failures and  
14  
15 disappointments, loss, and social isolation.  
16  
17  
18  
19

20  
21 **Conclusions:** HF is associated with positive trajectories of recovery among homeless  
22  
23 adults with mental illness. Those who did not receive housing or support continued to  
24  
25 struggle across a wide range of life domains. Findings are discussed with implications for  
26  
27 addressing services and broader social change in order to benefit this marginalized and  
28  
29 disenfranchised population.  
30  
31  
32  
33  
34  
35  
36  
37  
38  
39  
40  
41  
42  
43  
44  
45  
46  
47  
48  
49  
50  
51  
52  
53  
54  
55  
56  
57  
58  
59  
60

## ARTICLE SUMMARY

### Article focus

- Trajectories of recovery among homeless adults with mental illness over 18 months of participation in a randomized controlled trial where participants received Housing First (HF) with intensive support services or treatment as usual (TAU; no housing or supports through the study).
- Narrative interviews (n=43) were conducted at baseline and at 18 months follow-up and were classified as positive, negative, mixed or neutral trajectories of recovery.
- Thematic analysis was used to examine the factors that contribute to different trajectories of recovery.

### Key messages

- Participants assigned to HF described predominantly positive trajectories; no participants reported negative trajectories. Participants assigned to TAU reported predominantly negative or neutral trajectories; only two TAU participants received supported housing outside of the study.

- Positive trajectories were characterized by obtaining good-quality housing, reduced substance use, efforts to expand social supports, positive expressions of identity, and the willingness to self-reflect.
- Negative and neutral trajectories were characterized by recent eviction, heavy substance use and/or recent relapse after a period of decreased use, perceived failures and disappointments, loss and social isolation.

### **Strengths and limitations of this study**

- This study is the first to use longitudinal, narrative data from adults with mental illness who were randomly assigned to HF or TAU. Additional strengths include specific measures to enhance trustworthiness of the data.
- Despite using multiple, independent coders, classifying trajectories among such a marginalized population is challenging given the volatility in people's lives.

## Introduction

It is well known that the co-occurrence of homelessness and mental illness is associated with a range of health, social and systemic challenges that make goals of residential stability and recovery difficult.<sup>1-3</sup> As a result, many homeless individuals with mental illness appear to be caught in a “revolving door” of institutional care, shelter use, substandard accommodation, and periods of sleeping rough on the streets.<sup>4-6</sup> In an effort to interrupt this cycle, *Housing First* (HF) was developed to reach the “hardest to house.”<sup>3</sup> HF offers homeless people with mental illness immediate access to independent, market-lease apartments without any requirements around sobriety or engagement in treatment. HF has also been offered in congregate settings where all or a significant proportion of the tenants are program participants.<sup>7</sup> In both independent and congregate settings, HF participants are provided access to treatment and services, but choose their level of participation. A growing body of research on HF has documented a variety of positive outcomes including residential stability,<sup>8,9</sup> quality of life,<sup>10</sup> community integration,<sup>11</sup> and client satisfaction.<sup>12</sup>

Over the past 20 years, a number of qualitative studies have examined homeless people’s subjective experience of life on the streets and in shelters,<sup>13</sup> mental illness,<sup>14</sup> substance use,<sup>15,16</sup> various health and social services,<sup>17,18</sup> and different types of housing.<sup>8,19,20</sup> However, few qualitative studies have followed homeless adults over time, before and after receiving supported housing<sup>20</sup> or have examined what factors influence different trajectories of recovery.<sup>21</sup> For the most part, prior research on trajectories among a variety of marginalized populations has followed variable-centered (e.g., cluster analysis and other quantitative techniques) rather than person-centered strategies, thereby

1  
2  
3 losing the focus on how multiple events, conditions and experiences come together to  
4  
5 comprise an individual's perception and experience.<sup>22</sup> Moreover, few qualitative studies  
6  
7 have been conducted alongside randomized controlled trials.<sup>23,24</sup>  
8  
9

10  
11 The Vancouver At Home Study is part of a multi-site, mixed-methods randomized  
12  
13 controlled trial to examine the effectiveness of HF interventions compared to existing  
14  
15 services (Treatment as Usual; TAU) among homeless adults with mental illness in five  
16  
17 Canadian cities.<sup>24-26</sup> The current study focuses on narrative data from the Vancouver site,  
18  
19 which includes a high proportion of participants who met criteria for substance  
20  
21 dependence, and is the only site that implemented HF in a congregate setting as well as in  
22  
23 independent apartments. The current study uses thematic analysis to examine participant  
24  
25 narratives before and after random assignment to HF or TAU (no housing or supports  
26  
27 provided by the study) and seeks to identify positive, negative, mixed or neutral  
28  
29 trajectories of recovery and the factors related to different trajectories.  
30  
31  
32  
33  
34

## 35 36 **Methods**

### 37 38 *Participants and Sampling*

39  
40 Eligibility criteria included legal adult status (over 19 years of age), presence of a  
41  
42 current mental disorder based on a semi-structured interview, and being absolutely  
43  
44 homeless or precariously housed.<sup>25</sup> Participants were recruited through referral from a  
45  
46 wide variety of agencies that serve the homeless including shelters, drop-in centers,  
47  
48 outreach teams, hospitals, and corrections programs. All participants met with a trained  
49  
50 research interviewer who explained procedures, confirmed study eligibility, and obtained  
51  
52 informed consent.  
53  
54  
55  
56  
57  
58  
59  
60



1  
2  
3  
4  
5  
6  
7  
8  
9  
10  
11  
12  
13  
14  
15  
16  
17  
18  
19  
20  
21  
22  
23  
24  
25  
26  
27  
28  
29  
30  
31  
32  
33  
34  
35  
36  
37  
38  
39  
40  
41  
42  
43  
44  
45  
46  
47  
48  
49  
50  
51  
52  
53  
54  
55  
56  
57  
58  
59  
60

Eligible participants completed a series of baseline questionnaires, and were differentiated into two groups based on the complexity and intensity of their needs. Participants were categorized as High Need (HN) based on a Multnomah Community Ability Scale (MCAS) score of 62 or lower and current bipolar or psychotic disorder as well as one of the following: legal involvement in the past year; substance dependence in the past month; two or more hospitalizations for mental illness in any one of the past five years. All other eligible participants were categorized as Moderate Need (MN).

HN participants were randomized to one of three study arms: (1) HF with Assertive Community Treatment (ACT)<sup>a</sup> in which participants could choose from up to three market lease apartments in a variety of neighborhoods and services were provided by a multi-disciplinary outreach team; (2) Congregate Housing with on-site support (CONG) in which participants had their own room and bathroom but shared amenity space with 100 other program participants and received three meals per day as well as activity programming and various health services on site; and (3) Treatment as Usual (HN-TAU) which provided no additional housing or support services beyond what was already available in the community. MN participants were randomized to one of two study arms: (1) HF with Intensive Case Management (ICM)<sup>b</sup> in which participants could choose from up to three market lease apartments in a variety of neighborhoods and

---

<sup>a</sup> ACT is a multi-disciplinary outreach team that works with people with SMI in their neighborhood. It was available to participants assigned to Housing First with ACT but was not mandatory. The only requirement for housing was compliance with the rental lease and weekly visits with a case manager to ensure well-being.

<sup>b</sup> ICM is comprised of a team of case managers who link participants to existing services in the community. As with participants assigned to ACT, it was available to participants assigned to ICM but was not required.

1  
2  
3 services were provided by a team of case managers who connected participants to  
4 existing services; and (2) MN-TAU. Randomization was completed via a central  
5  
6  
7  
8 computerized algorithm that assigned participants to groups at the completion of the  
9  
10  
11 baseline interview.

12  
13  
14 Participants in the present study were both randomly and purposively selected from  
15 the larger sample of Vancouver study participants. Purposive sampling was based on both  
16  
17  
18 typical and unusual cases, in an effort to represent differences across gender, ethnicity,  
19  
20  
21 sexual orientation, duration of homelessness, and degree of functional impairment. After  
22  
23  
24 completing a series of baseline questionnaires, participants were randomized to one of  
25  
26  
27 five possible study arms, based on their level of need (“moderate” or “high”). Need level  
28  
29  
30 and study arm were determined by a computer algorithm.<sup>25</sup>

31  
32 Within one month of enrollment in the larger study, selected participants were  
33  
34 contacted and asked if they would like to participate in a “personal story interview.”  
35  
36 Participation was voluntary, and two out of 54 participants declined to participate. The  
37  
38 current study is based on narrative interviews from 43 participants who were interviewed  
39  
40  
41 at within one month of recruitment and re- interviewed 18 months later. Reasons for loss  
42  
43  
44 to follow-up include: death (1), refused participation (1), in jail (2), moved out of town  
45  
46  
47 (1), and unable to locate (4). Of the 52 baseline interviews, 32 participants were assigned  
48  
49  
50 to HF (ACT: n=10; CONG: n=10; ICM: n=12) and 20 were assigned to TAU (HN-TAU:  
51  
52  
53 n=10; MN-TAU: n=10). Of the 43 follow-up interviews, 28 participants received HF  
54  
55  
56 (ACT: n=9; CONG: n=10; ICM: n=9) and 15 participants were assigned to TAU (HN-  
57  
58  
59 TAU: n=7; MN-TAU: n=8).  
60

### ***Data Collection***

Four university-based researchers and one peer interviewer, who had experienced homelessness and mental illness, conducted the narrative interviews. Interviews lasted from one to two hours and were conducted at a setting chosen by the participant, usually a community agency or the project field office. All participants gave informed consent and received \$30 upon completion of each interview. Institutional Research Ethics Board approval was obtained from Simon Fraser University and the University of British Columbia.

Using a semi-structured interview format, participants worked with interviewers at baseline to co-construct a personal story highlighting (a) their pathway into homelessness; (b) experiences of being homeless or inadequately housed; (c) experiences around first learning they had a mental illness and obtaining help for their illness; and (d) high, low, and turning points in their life. The 18-month follow-up interview focused on changes since the first interview in the areas of typical day, housing, service use, experience of community, social ties, hopes for the future, and key life events. Interviews were audio recorded and transcribed verbatim.

### ***Data Analysis***

Each participant's baseline and the 18-month follow-up interview were compared and their overall trajectories were categorized as 'positive,' 'negative,' 'mixed' or 'neutral.' Categorizations were based on 22 identified domains including housing stability, mental health, substance use, physical health, criminal justice activity, social interactions, hopes for the future, sense of self and interviewer observations. Each

1  
2  
3 transcript was coded for positive, negative, mixed or no change on each of the identified  
4 domains. If the number of positive events or attributions clearly outnumbered the  
5 number of negative factors, the trajectory was coded as “positive.” Conversely, if the  
6 number of negative events clearly outnumbered positive, the trajectory was coded as  
7 “negative.” If the number of negative and positive events were roughly equal, the  
8 trajectory was categorized as “mixed;” and if there was no clear change over time on the  
9 majority of factors, the trajectory was categorized a “neutral.”  
10  
11  
12  
13  
14  
15  
16  
17  
18  
19

20  
21 Thematic analysis was used to examine the interview transcripts in relation to  
22 factors that contribute to positive, negative, or neutral trajectories. To ensure rigor, the  
23 interviewing team met four times during the early phase of thematic analysis to co-code  
24 and discuss emergent themes in the narratives. Subsequently, two researchers  
25 independently coded all transcripts line-by-line, classified trajectories, and identified  
26 repeated or similar codes to build a set of overarching themes.<sup>27,28</sup> After a thorough  
27 review of the transcripts and field notes, conceptual impressions were integrated into key  
28 thematic areas. At this point, thematic areas and initial interpretations were shared with  
29 field interviewers and researchers whose interpretations were cross-checked with the  
30 initial findings. Any coding differences were resolved by consensus review of the data.  
31  
32  
33  
34  
35  
36  
37  
38  
39  
40  
41  
42  
43  
44

45 According to this approach, emphasis is on the content of the text (*what* is said)  
46 rather than on structural or discourse analysis (*how* it is said). The thematic approach is  
47 useful for finding commonalities in the events and experiences reported by participants.  
48 Our thematic analysis reflects ideas brought to the data set from the research questions  
49 and existing literature (i.e., top-down), as well as themes that emerge from the data (i.e.,  
50 bottom-up).  
51  
52  
53  
54  
55  
56  
57  
58  
59  
60

1  
2  
3  
4  
5  
6  
7  
8  
9  
10  
11  
12  
13  
14  
15  
16  
17  
18  
19  
20  
21  
22  
23  
24  
25  
26  
27  
28  
29  
30  
31  
32  
33  
34  
35  
36  
37  
38  
39  
40  
41  
42  
43  
44  
45  
46  
47  
48  
49  
50  
51  
52  
53  
54  
55  
56  
57  
58  
59  
60

*Monitoring quality.* All interviewers received training on qualitative interviewing in general and how to use the interview guides. The first two interviews that each interviewer conducted were reviewed in detail by the team and feedback was provided to the interviewers. The qualitative team met as a group bi-monthly to review transcripts. These meetings focused on improving the quality of interviewing (e.g., posing open ended questions, probing adequately, avoiding leading questions, etc.) as well as exploring emerging themes. Five audio files from both the baseline and follow-up interviews were reviewed by a qualitative researcher external to the team who was familiar with the interview guide. The audio files were checked against their respective transcripts and a checklist, which assessed coverage of key topics and probes, was completed.

## Results

### *Sample characteristics*

Demographic characteristics at baseline for participants who took part in the narrative interviews at both baseline and at 18 months follow-up are presented in Table 1. No significant differences were observed among baseline demographic characteristics for the original baseline sample and those re-interviewed after 18 months. As noted in Table 1, the age of the follow-up sample ranged from 21 to 66 years (mean = 43 years) and included 25 men (58%), 16 women (37%), and 2 (5%) transgendered individuals. At baseline, the mean lifetime duration of homelessness was 6 years and only 30% had completed high school. The most commonly identified mental disorders among the

1  
2  
3 sample were Psychotic Disorder (49%) and Major Depressive Episode (49%). In  
4  
5 addition, 67% met criteria for Substance Dependence.  
6  
7

8  
9 [Insert Table 1 about here]  
10

### 11 *Narrative findings*

12  
13 *Classification of trajectories:* Participant narratives reflected a variety of  
14  
15 trajectories over time (see Table 2). Participants who received HF (n=28) through the  
16  
17 study most often reported positive (n=17) or mixed (n=9) trajectories over the 18 month  
18  
19 observation period; two participants were classified as neutral; and none were negative.  
20  
21 Participants assigned to TAU (n=15) were most often classified as negative (n=5) or  
22  
23 neutral (n=5) trajectories, with the remaining trajectories distributed among the positive  
24  
25 and mixed categories.  
26  
27  
28  
29  
30  
31

32  
33 [Insert Table 2 about here]  
34  
35

36 Significant improvement across a range of domains (positive trajectories) was  
37  
38 reported by 17 HF participants, including two female participants in MNTAU who  
39  
40 received supported housing outside of the study. A third participant in MNTAU was  
41  
42 living in a recovery home and making progress toward managing his substance use. At  
43  
44 the time of the interview, he felt very proud of being abstinent for eight months and felt  
45  
46 very optimistic about the future.  
47  
48  
49

50  
51 *Key themes:* Obtaining **good-quality, stable housing** was clearly the primary  
52  
53 contributor to positive trajectories as it affected many areas of people's lives (e.g., health,  
54  
55 social, identity, financial, leisure time). For example, according to one HF participant,  
56  
57  
58  
59  
60

1  
2  
3  
4  
5  
6  
7  
8  
9  
10  
11  
12  
13  
14  
15  
16  
17  
18  
19  
20  
21  
22  
23  
24  
25  
26  
27  
28  
29  
30  
31  
32  
33  
34  
35  
36  
37  
38  
39  
40  
41  
42  
43  
44  
45  
46  
47  
48  
49  
50  
51  
52  
53  
54  
55  
56  
57  
58  
59  
60

*“Having a nice place makes me think better about myself. I can tell people where I live and invite them over. Like my family. I can’t describe how it makes me feel!”* It is notable, that no one who received HF (of any type) reported negative trajectories.

Several participants in the HF study arms had achieved a period of stable housing (typically for six to 12 months) but had since experienced eviction. The experience of **losing housing** greatly affected their perceptions of well-being across multiple life domains. For example, one woman had been stably housed for eight months and had made significant gains before relapsing and losing her housing. At the time of the interview, she had been living in a single room occupancy (SRO) hotel for six months and felt deeply ashamed about her circumstances: *“I’m an addict. I screwed up. ... Maybe I’m not good enough to have an apartment. I’m thinking that now.”*

The primary reason for eviction was **relapse into substance use** and related behaviors that created problems with neighbors and landlords. Drug relapse was often triggered by boredom and social interactions that elicited painful memories and feelings related to the past (e.g., perceived rejection by friends and family, interpersonal conflict). The few participants who did not have histories of heavy drug use and those who were able to significantly reduce their use of drugs were more likely to report positive trajectories than those who continued with frequent and heavy substance use.

Mixed trajectories indicated a roughly even split of positive and negative change. Often, participants made efforts to create change from baseline to follow-up, but encountered obstacles such that they did not follow through with the change. Mixed trajectories were often characterized by **perceived failures and disappointments** across multiple domains. For example, one man who received housing attempted to return to

1  
2  
3 school and to reconnect with his family; however, both of these attempts at creating  
4  
5 change did not go well from his perspective and contributed to feelings of depression and  
6  
7 hopelessness. *“I made contact with a couple of my aunts and took them for dinner. It*  
8  
9 *didn't go well. It brought everything back again. Whatever. So I just said, 'screw it. I*  
10  
11 *give up.”* As a result, he isolated himself from others, which further increased thoughts  
12  
13 and feelings related to failure and disappointment.  
14  
15

16  
17 Neutral trajectories were characterized by no significant change (e.g., continued  
18  
19 drug use, health problems, negative experiences with the system, feelings about one's self  
20  
21 and others, etc.). The emotional tone of these trajectories was often also neutral or flat.  
22  
23 For example, according to one TAU participant who was evicted from social housing, *“I*  
24  
25 *don't know why. (Interviewer: How did that affect you?) I don't know. It just*  
26  
27 *happened.”* Neutral trajectories were most common among the TAU groups compared to  
28  
29 the HF groups, which were more likely to report positive or mixed trajectories.  
30  
31  
32  
33

34 **Perceived loss** of one's health and loved ones was a common theme among  
35  
36 mixed, neutral and negative trajectories. One man was struggling with a chronic physical  
37  
38 illness which caused him significant pain. One woman was hit by a car while riding her  
39  
40 bike and suffered a head injury. Another man had separated from his long-term  
41  
42 girlfriend. In all of these cases, the perceived loss and associated pain (both physical and  
43  
44 psychological) colored participants' perceptions of change and well-being across a wide  
45  
46 range of life domains. For example, the woman who had been hit by a bike stated, *“I*  
47  
48 *have no one to blame but myself for any of this crap. It's all my fault.”*  
49  
50  
51  
52

53 Many participants reported difficulties with social ties, particularly **trusting**  
54  
55 **others** and developing healthy relationships. As a result, many participants reported  
56  
57  
58  
59  
60



1  
2  
3 being very socially isolated. Those participants who had more well-developed social  
4 skills and were able to take risks to engage with others and their community tended to  
5 report more positive trajectories than those who self-isolated. For example, according to  
6 one HF participant, *“I’m trying to build acquaintances into friendships, which I’ve had a  
7 really hard time with. I’m surprised I have a girlfriend now. That really surprises me  
8 because what I’ve gone through, I find it hard to get close to people.”* In some cases,  
9 pets were helpful and made it easier for people to interact with others as well as  
10 experience the benefits of caring for and feeling responsible for another living creature.  
11  
12

13  
14  
15 A factor that closely aligned to positive trajectories was **expression of positive**  
16 **identity**. Many participants struggled to let go of their homeless identity, especially  
17 those participants who had been homeless for long periods of time (several participants  
18 had been homeless for more than ten years). Opportunities that promoted the  
19 development of a positive personal and social identity, independent of homelessness,  
20 were often present among those who described positive trajectories. One participant was  
21 very involved in a community choir, which provided a sense of purpose and identity.  
22 Another participant was coaching a softball team for homeless and formerly homeless  
23 people. Several other participants were training to become peer support workers. Being  
24 able to expand one’s social roles as a parent, sibling, friend, lover, employee, among  
25 other roles, allowed participants to challenge longstanding beliefs related to negative self-  
26 worth. At the same time, it was important for many participants to maintain links with  
27 their old identities and routines; among those who described positive trajectories, there  
28 appeared to be a gradual process of letting go and shifting to new social roles and  
29 activities.  
30  
31  
32  
33  
34  
35  
36  
37  
38  
39  
40  
41  
42  
43  
44  
45  
46  
47  
48  
49  
50  
51  
52  
53  
54  
55  
56  
57  
58  
59  
60

1  
2  
3 Finally, narratives classified as positive trajectories tended to reflect a **willingness**  
4 **to introspect** and reflect on one's experience and to learn from the past. Some  
5  
6 participants' responses were very cryptic and it was very difficult to elicit introspection  
7  
8 around changes and reasons for change or lack thereof. This was particularly the case  
9  
10 among TAU participants; while the majority engaged in the interview, approximately  
11  
12 one-third provided very cryptic responses (i.e., one-word answers, "I don't know," "I  
13  
14 don't want to talk about it," etc.) in what seemed like a strategy to end the interview as  
15  
16 quickly as possible.  
17  
18  
19  
20  
21

## 22 **Discussion**

23  
24  
25 This study is the first to use longitudinal, narrative data from homeless adults with  
26  
27 mental illness who were randomly assigned to HF or TAU (no housing or supports  
28  
29 provided through the study) to examine trajectories of recovery. Given that most other  
30  
31 longitudinal narrative research has not been conducted alongside a randomized controlled  
32  
33 trial, our research is an important contribution to the growing literature on the effects of  
34  
35 HF on adults with mental illness.  
36  
37  
38  
39  
40

41  
42 Participants assigned to HF presented with positive, mixed or neutral trajectories  
43  
44 over the 18-month study period. No HF participants (of any type) reported negative  
45  
46 trajectories over time. By contrast, positive trajectories were rare among TAU  
47  
48 participants. No participants in HN-TAU presented positive trajectories, while three  
49  
50 participants in MN-TAU described positive change. For the most part, narratives among  
51  
52 TAU participants reflected negative or neutral trajectories; participants continued to  
53  
54 experience a range of challenges related to housing, physical and mental health,  
55  
56  
57  
58  
59  
60

1  
2  
3 substance use, trauma, and marginalization that culminated in increasingly poor  
4  
5 functioning. Social losses including deaths of loved ones and severed relationships with  
6  
7 parents, children and siblings highlight seriously depleted social networks similar to  
8  
9 previous studies.<sup>21,29,30</sup>  
10  
11

12  
13  
14 Perceived success and positive change was often attributed to obtaining good  
15  
16 quality housing and reduced substance use. Positive trajectories were also characterized  
17  
18 by positive expressions of one's identity, efforts to expand one's social network and  
19  
20 social roles (particularly with children and family), and the willingness to introspect and  
21  
22 reflect on one's thoughts, feelings, and behaviors. Negative and neutral trajectories were  
23  
24 characterized by continued heavy substance use and/or recent relapse after a period of  
25  
26 decreased use, perceived failures and disappointments, loss (especially related to health  
27  
28 and the death of loved ones), and social isolation. Neutral and mixed trajectories were  
29  
30 inherently more variable than positive and negative trajectories. For example, neutral  
31  
32 trajectories could reflect a continued negative path or a continued pattern of positive and  
33  
34 negative (mixed) experiences. Mixed trajectories were often reflective of a tumultuous  
35  
36 pattern of positive and negative experiences that could not be clearly categorized as  
37  
38 positive or negative.  
39  
40  
41  
42  
43  
44

45  
46 Narratives revealed that recovery and reclaiming stability in housing, health,  
47  
48 social ties, among other domains, is very difficult work -- slips and relapses are common.  
49  
50 Collectively, the narratives highlight the tremendous challenge for people to move  
51  
52 indoors and into community after years and sometimes decades outside, and often longer  
53  
54 as people 'on the margins.' Eighteen months provided most participants only the initial  
55  
56 steps into recovery. Many HF participants who demonstrated positive trajectories had  
57  
58  
59  
60

1  
2  
3 experienced either an eviction or a planned move from their original housing placement.  
4  
5 Our findings highlight the importance of supporting homeless people with mental  
6  
7 disorders through stages of change that include relapse and eviction. Oftentimes, in  
8  
9 hindsight, these moves and the support received from service teams were significant  
10  
11 turning points and learning experiences for participants.  
12  
13

14  
15 Recovery depends, in part, upon addressing the often hidden psychological  
16  
17 burdens of previous traumas, as well as the ongoing chronic stressors of poverty and  
18  
19 social isolation. In this context, recovery needs to be broadened to address complications  
20  
21 and challenges beyond mental illness. Although all of our participants struggled with  
22  
23 mental health issues, mental illness and treatment per se was not the focus of the  
24  
25 interviews.<sup>30,31</sup> Themes related to social support, identity, substance use, and daily living  
26  
27 skills were much more prominent.<sup>21</sup>  
28  
29

30  
31 As noted in past research,<sup>21,32</sup> good quality housing is pivotal to recovery; however,  
32  
33 isolation and boredom are key challenges once housed. For most participants, many of  
34  
35 the structural and individual factors that contributed to homelessness continued to impact  
36  
37 their daily lives (i.e., poverty and lack of resources, poor mental and physical health,  
38  
39 social isolation, poor coping skills, lack of meaningful activities). The lack of  
40  
41 opportunity to develop a new daily routine from which to develop a sense of well-being  
42  
43 and identity was particularly evident.<sup>15</sup> When a tolerable identity centers on the homeless  
44  
45 lifestyle, the likelihood of the individual leaving the subculture becomes minimal.<sup>33,34</sup>  
46  
47

48  
49 Examination of the trajectories in our study revealed that progress in recovery reflected  
50  
51 the stages of change model,<sup>35</sup> that is, change was gradual and cumulative, setbacks were  
52  
53  
54  
55  
56  
57  
58  
59  
60

1  
2  
3 often sudden and devastating, and maintaining gains often meant being stuck on a plateau  
4  
5 with few options for positive change.  
6  
7

### 8 ***Limitations***

9  
10 The themes and emotional tone of the narratives were very much affected by  
11  
12 participants' recent circumstances. Several participants noted that if their interview had  
13  
14 been one week earlier, their perspective would be different. Some participants had made  
15  
16 great improvement during the course of the study, but had recently relapsed in to  
17  
18 substance use and/or had lost their housing. These events tended to color their narratives  
19  
20 in a very negative light; however, our analysis relied on narratives from two different  
21  
22 time points and also incorporated field notes. Finally, classifying trajectories is  
23  
24 challenging given the volatility and multidimensionality of people's lives.<sup>21</sup> We found  
25  
26 that positive and negative trajectories were much easier to code than mixed or neutral.  
27  
28  
29  
30  
31

### 32 ***Future Directions***

33  
34  
35 Recovery is situated within shifting identities and social roles within individuals,  
36  
37 sub-communities, the larger community, and society itself. Most mental health and  
38  
39 housing research has focused on developing services to change individuals rather than  
40  
41 potential changes to communities or broader society that would support and include  
42  
43 marginalized individuals.<sup>13,15</sup> Access to safe, affordable housing; treatment for mental  
44  
45 and substance use disorders; and opportunities for social connection and meaningful  
46  
47 activities is critical to recovery from homelessness. Service providers and policy makers  
48  
49 have the opportunity to facilitate recovery by ensuring services are not class-based. This  
50  
51 includes expanding services for homeless individuals to communities outside of poor  
52  
53 neighborhoods as well as mobile outreach and service delivery programs. Social action is  
54  
55  
56  
57  
58  
59  
60

1  
2  
3 not just required to increase the participation of marginalized citizens but also to modify  
4  
5 the power relationships between various social groups. (3,903 words)  
6  
7

### 8 9 **Acknowledgements**

10  
11 Thanks to Nancy Laliberte, Allison Laing, Arianna Kennedy, and Melinda Markey who  
12  
13 conducted the interviews with participants; and Verena Strehlau, Sindi Addorisio, Bernd  
14  
15 Mueller, Bijan Nassiri and Jeff Lawlor who helped locate participants. The authors also  
16  
17 thank the At Home/Chez Soi Project collaborative at national and local levels; National  
18  
19 project team: J. Barker, PhD (2008–2011) and C. Keller, National Project Leads; P.  
20  
21 Goering, RN, PhD, Research Lead; approximately 40 investigators from across Canada  
22  
23 and the US; 5 site coordinators; numerous service and housing providers; and persons  
24  
25 with lived experience.  
26  
27  
28  
29

### 30 31 32 **Funding**

33  
34  
35 Funded by the Mental Health Commission of Canada; Health Canada. The views  
36  
37 expressed herein solely represent the authors.  
38  
39

### 40 41 **Author Contributions**

42  
43 MP drafted the manuscript, oversaw implementation of the interviews, and coded all the  
44  
45 interviews. SR, LC and JS coded subsets of the interviews. SR transcribed all the  
46  
47 interviews. JS was the principal investigator. All authors contributed to the final  
48  
49 manuscript.  
50  
51

### 52 53 54 **Competing Interests**

55  
56  
57 The authors have no competing interests to declare.  
58  
59  
60

## Data Sharing

MP drafted the manuscript, oversaw implementation of the interviews, and coded all the interviews. SR, LC and JS coded subsets of the interviews. SR transcribed all the interviews. JS was the principal investigator. All authors contributed to the final manuscript.

For peer review only

## References

- 1 Draine J, Salzer MS, Culhane DP, *et al.* Role of Social Disadvantage in Crime, Joblessness, and Homelessness Among Persons With Serious Mental Illness. *Psychiatr Serv* 2002;**53**:565–73.
- 2 Kertesz SG, Crouch K, Milby JB, *et al.* Housing first for homeless persons with active addiction: are we overreaching? *Milbank Q* 2009;**87**:495–534.
- 3 Tsemberis S, Eisenberg RF. Pathways to Housing: Supported Housing for Street-Dwelling Homeless Individuals With Psychiatric Disabilities. *Psychiatr Serv* 2000;**51**:487–93.
- 4 Culhane DP, Metraux S, Hadley TR. The impact of supportive housing for homeless people with severe mental illness on the utilization of the public health, corrections, and emergency shelter systems: The New York-New York Initiative. *Hous Pol Debate* 2002;**13**:107–63.
- 5 Davis L, Fulginiti A, Kriegel L, *et al.* Deinstitutionalization? Where Have All the People Gone? *Curr Psychiatry Rep*; **14**:259–69.
- 6 Hopper K, Jost J, Hay T, *et al.* Homelessness, severe mental illness, and the institutional circuit. *Psychiatr Serv* 1997;**48**:659–65.
- 7 Levitt AJ, Jost JJ, Mergl KA, *et al.* Impact of Chronically Street Homeless Tenants in Congregate Supportive Housing. *Am J Orthopsychiatry* 2012;**82**:413–20.
- 8 Gilmer TP, Stefancic A, Ettner SL, *et al.* Effect of Full-Service Partnerships on Homelessness, Use and Costs of Mental Health Services, and Quality of Life Among Adults With Serious Mental Illness Homelessness Services in Mentally Ill Adults. *Arch Gen Psychiatry* 2010;**67**:645–52.
- 9 Gulcur L, Stefancic A, Shinn M, *et al.* Housing, hospitalization, and cost outcomes for homeless individuals with psychiatric disabilities participating in continuum of care and housing first programmes. *J Comm Appl Soc Psychiatry* 2003;**13**:171–86.
- 10 Patterson ML, Moniruzzaman A, Palepu A, *et al.* Housing First improves subjective quality of life among homeless adults with mental illness: 12-month findings from a randomized controlled trial in Vancouver, British Columbia. *Soc Psychiatry Psychiatr Epidemiol* Published Online First: 2013. doi:10.1007/s00127-013-0719-6
- 11 Yanos PT, Felton BJ, Tsemberis S, *et al.* Exploring the role of housing type, neighborhood characteristics, and lifestyle factors in the community integration of formerly homeless persons diagnosed with mental illness. *J Ment Health* 2007;**16**:703–17.
- 12 Siegel C, Samuels J, Tang D-I, *et al.* Tenant Outcomes in Supported Housing and



- 1  
2  
3  
4  
5  
6  
7  
8  
9  
10  
11  
12  
13  
14  
15  
16  
17  
18  
19  
20  
21  
22  
23  
24  
25  
26  
27  
28  
29  
30  
31  
32  
33  
34  
35  
36  
37  
38  
39  
40  
41  
42  
43  
44  
45  
46  
47  
48  
49  
50  
51  
52  
53  
54  
55  
56  
57  
58  
59  
60
- Community Residences in New York City. *Psychiatr Serv* 2006;**57**:982–91.
- 13 Hooper K. *Reckoning With Homelessness*. Cornell University Press 2003.
- 14 Forchuk C, Ward-Griffin C, Csiernik R, *et al*. Surviving the tornado of mental illness: psychiatric survivors' experiences of getting, losing, and keeping housing. *Psychiatr Serv* 2006;**57**:558–62.
- 15 McNaughton CC. Transitions through homelessness, substance use, and the effect of material marginalization and psychological trauma. *Drugs Edu Prev Pol* 2008;**15**:177–88.
- 16 Tyler KA, Johnson KA. Pathways in and out of substance use among homeless-emerging adults. *J Adol Res* 2006.
- 17 Lipsky M. *Street-Level Bureaucracy: Dilemmas of The Individual In Public Services*. New York: : Russell Sage Foundation 1980.
- 18 Tischler V, Rademeyer A, Vostanis P. Mothers experiencing homelessness: mental health, support and social care needs. *Health Soc Care Community* 2006;**15**:246–53.
- 19 Kirkpatrick H, Byrne C. A narrative inquiry: moving on from homelessness for individuals with a major mental illness. *J Psychiatr Ment Health Nurs* 2009;**16**:68–75.
- 20 Nelson G, Clarke J, Febbraro A, *et al*. A narrative approach to the evaluation of supportive housing: stories of homeless people who have experienced serious mental illness. *Psychiatr Rehabil J* 2005;**29**:98–104.
- 21 Padgett DK, Henwood B, Abrams C, *et al*. Social relationships among persons who have experienced serious mental illness, substance abuse, and homelessness: Implications for recovery. *Am J Orthopsychiatry* 2008;**78**:333–9.
- 22 Singer B, Ryff CD, Carr D, *et al*. Linking Life Histories and Mental Health: A Person-Centered Strategy. *Sociological Methodology* 1998;**28**:1–51.
- 23 Lewin S, Glenton C, Oxman AD. Use of qualitative methods alongside randomised controlled trials of complex healthcare interventions: methodological study. *BMJ* 2009;**339**:b3496–6.
- 24 Macnaughton EL, Goering PN, Nelson GB. Exploring the Value of Mixed Methods Within the At Home/Chez Soi Housing First Project: A Strategy to Evaluate the Implementation of a Complex Population Health Intervention for People With Mental Illness Who Have Been Homeless. *Can J Public Health* 2012;**103**:eS57–eS63.
- 25 Goering PN, Streiner DL, Adair C, *et al*. The At Home/Chez Soi trial protocol: a pragmatic, multi-site, randomised controlled trial of a Housing First intervention for

- 1  
2  
3  
4  
5  
6  
7  
8  
9  
10  
11  
12  
13  
14  
15  
16  
17  
18  
19  
20  
21  
22  
23  
24  
25  
26  
27  
28  
29  
30  
31  
32  
33  
34  
35  
36  
37  
38  
39  
40  
41  
42  
43  
44  
45  
46  
47  
48  
49  
50  
51  
52  
53  
54  
55  
56  
57  
58  
59  
60
- homeless individuals with mental illness in five Canadian cities. *BMJ Open* 2011;**1**:e000323–3.
- 26 Zabkiewicz DM, Patterson M, Somers JM, *et al.* The Vancouver At Home Study: Overview and Methods of a Housing First Trial Among Individuals Who are Homeless and Living with Mental Illness. *J Clin Trials* 2012.
- 27 Morse JM, Field PA. *Qualitative Research Methods for Health Professionals*. Sage Publications 1995.
- 28 Strauss AL. *Qualitative Analysis for Social Scientists*. Cambridge University Press 1987.
- 29 Hawkins RL, Abrams C. Disappearing acts: The social networks of formerly homeless individuals with co-occurring disorders. *Soc Sci Medicine* 2007;**65**:2031–42.
- 30 Padgett DK, Smith BT, Henwood BF, *et al.* Life course adversity in the lives of formerly homeless persons with serious mental illness: context and meaning. *Am J Orthopsychiatry* 2012;**82**:421–30.
- 31 Bhui K, Shanahan L, Harding G. Homelessness and mental illness: a literature review and a qualitative study of perceptions of the adequacy of care. *Int J Soc Psychiatry* 2006;**52**(2):152-165
- 32 Williams S, Stickley T. Stories from the streets: people's experiences of homelessness. *J Psychiatr Ment Health Nurs* 2011;**18**:432–9.
- 33 Coumans M, Spreen M. Drug use and the role of homelessness in the process of marginalization. *Substance Use & Misuse* 2003;**38**:311–38.
- 34 Farrington A, Robinson WP. Homelessness and strategies of identity maintenance: a participant observation study. *Journal of Community & Applied Social Psychology* 1999;**9**:175–94.
- 35 Prochaska JO, DiClemente CC. *Toward a comprehensive model of change*. Plenum Press 1986. In: Miller W, Heather N, eds. *Treating addictive behaviors: Processes of change*. Applied clinical psychology. New York, NY: Plenum Press, 1986:3-27

1  
2  
3  
4  
5  
6  
7  
8  
9  
10  
11  
12  
13  
14  
15  
16  
17  
18  
19  
20  
21  
22  
23  
24  
25  
26  
27  
28  
29  
30  
31  
32  
33  
34  
35  
36  
37  
38  
39  
40  
41  
42  
43  
44  
45  
46  
47  
48  
49  
50  
51  
52  
53  
54  
55  
56  
57  
58  
59  
60

For peer review only

**Table 1. Demographic characteristics at baseline for the original baseline sample (n=52) and those re-interviewed after 18-months (n=43)**

|                                            | Baseline         |    | 18M follow-up    |    |
|--------------------------------------------|------------------|----|------------------|----|
|                                            | Mean (years)     |    | Mean (years)     |    |
| Age (range, median)                        | 42 (21-66, 42.5) |    | 43 (21-66, 42.1) |    |
| Lifetime duration homeless (range, median) | 5.5 (0.2-33, 3)  |    | 5.9 (0.2-33, 4)  |    |
|                                            | n                | %  | n                | %  |
| Gender                                     |                  |    |                  |    |
| Male                                       | 28               | 54 | 25               | 58 |
| Female                                     | 21               | 40 | 16               | 37 |
| Transgender                                | 3                | 6  | 2                | 5  |
| Race/Ethnicity                             |                  |    |                  |    |
| White                                      | 31               | 60 | 26               | 61 |
| Aboriginal                                 | 12               | 23 | 10               | 23 |
| Mixed/Other                                | 9                | 18 | 7                | 16 |
| Housing Status                             |                  |    |                  |    |
| Absolutely homeless                        | 42               | 81 | 35               | 81 |
| Precariously housed                        | 10               | 19 | 8                | 19 |
| Marital Status                             |                  |    |                  |    |
| Single, never married                      | 31               | 60 | 27               | 63 |
| Divorced/separated/widowed                 | 18               | 35 | 15               | 35 |
| Married/common law/other                   | 3                | 6  | 1                | 2  |
| Have Children under 18 years               | 17               | 33 | 15               | 35 |
| Education                                  |                  |    |                  |    |
| Grade 8 or less                            | 10               | 20 | 10               | 23 |
| Incomplete high school                     | 21               | 40 | 20               | 47 |
| Completed high school                      | 21               | 40 | 13               | 30 |

|                                       |    |    |    |    |
|---------------------------------------|----|----|----|----|
| Mental Disorders                      |    |    |    |    |
| Psychotic Disorder                    | 25 | 48 | 21 | 49 |
| Major Depressive Episode              | 24 | 46 | 21 | 49 |
| Mood Disorder with Psychotic Features | 15 | 29 | 14 | 33 |
| Post-Traumatic Stress Disorder        | 15 | 29 | 12 | 28 |
| Panic Disorder                        | 14 | 27 | 10 | 23 |
| Manic or Hypomanic Episode            | 10 | 19 | 8  | 19 |
| Substance Dependence                  | 33 | 63 | 29 | 67 |
| Alcohol Dependence                    | 11 | 21 | 10 | 23 |

Table 2. Recovery trajectories over 18 months by study arm.

| Study Arm                      | Trajectory Type  |                 |                 |                 |
|--------------------------------|------------------|-----------------|-----------------|-----------------|
|                                | Positive         | Negative        | Mixed           | Neutral         |
| <b>ACT (n=9)</b>               | 6                | 0               | 3               | 0               |
| <b>CONG (n=10)</b>             | 5 <sup>+</sup>   | 0               | 3 <sup>#</sup>  | 2 <sup>^</sup>  |
| <b>HNTAU (n=7)</b>             | 0                | 2               | 1               | 4               |
| <b>ICM (n=9)</b>               | 6                | 0               | 3               | 0               |
| <b>MNTAU (n=8)</b>             | 3                | 3               | 1               | 1               |
| <b><i>HF Total (n=28)</i></b>  | <b><i>17</i></b> | <b><i>0</i></b> | <b><i>9</i></b> | <b><i>2</i></b> |
| <b><i>TAU Total (n=15)</i></b> | <b><i>3</i></b>  | <b><i>5</i></b> | <b><i>2</i></b> | <b><i>5</i></b> |

<sup>+</sup> Two participants left the CONG residence within the first year and were living in supported housing elsewhere.

<sup>#</sup> Two of these participants left the CONG residence within the first year, one of whom was living in supported housing elsewhere and one of whom was living in an SRO.

<sup>^</sup> One of these participants left the CONG residence within the first year and was living in an SRO.



**Trajectories of recovery among homeless adults with mental illness who participated in a randomized controlled trial of Housing First: A longitudinal, narrative analysis**

|                                 |                                                                                                                          |
|---------------------------------|--------------------------------------------------------------------------------------------------------------------------|
| Journal:                        | <i>BMJ Open</i>                                                                                                          |
| Manuscript ID:                  | bmjopen-2013-003442.R1                                                                                                   |
| Article Type:                   | Research                                                                                                                 |
| Date Submitted by the Author:   | 20-Jul-2013                                                                                                              |
| Complete List of Authors:       | Patterson, Michelle; Simon Fraser University, Health Sciences<br>Rezansoff, Stefanie<br>Currie, Lauren<br>Somers, Julian |
| <b>Primary Subject Heading</b>: | Mental health                                                                                                            |
| Secondary Subject Heading:      | Health services research                                                                                                 |
| Keywords:                       | Health policy < HEALTH SERVICES ADMINISTRATION & MANAGEMENT, PUBLIC HEALTH, QUALITATIVE RESEARCH                         |
|                                 |                                                                                                                          |

SCHOLARONE™  
Manuscripts

**MANUSCRIPT COVER PAGE**

**TITLE. Trajectories of recovery among homeless adults with mental illness who participated in a randomized controlled trial of Housing First: A longitudinal, narrative analysis**

**AUTHORS:**

Michelle L. Patterson, PhD (corresponding author)

Adjunct Professor

Simon Fraser University

Faculty of Health Sciences

8888 University Drive, Blusson Hall Rm. 11010

Burnaby, British Columbia

V5A 1S6 Canada

[michelle\\_patterson@sfu.ca](mailto:michelle_patterson@sfu.ca)

Tel.: 778-782-5279

Stefanie Rezanoff, MSc

Simon Fraser University

Lauren Currie, MPH

Simon Fraser University

Julian M. Somers, PhD

Associate Professor

Simon Fraser University

**Key words:** homelessness, mental illness, recovery, qualitative



## ABSTRACT

**Objectives:** This study used longitudinal, narrative data to identify trajectories of recovery among homeless adults with mental illness alongside the factors that contribute to positive, negative, mixed or neutral trajectories over time. We expected that participants who received Housing First (HF) would describe more positive trajectories of recovery than those who were assigned to Treatment as Usual (TAU; no housing or support provided through the study).

**Design:** Narrative interview data was collected from participants at baseline and 18 months after random assignment to HF or TAU.

**Setting:** Participants were sampled from the community in Vancouver, British Columbia.

**Participants:** Fifty-four participants were randomly and purposively selected from the larger trial; 52 were interviewed at baseline and 43 were re-interviewed 18 months after randomization.

**Method:** Semi-structured interviews were conducted at both time points. For each participant, paired baseline and follow-up narratives were classified as positive, negative, mixed, or neutral trajectories of recovery, and thematic analysis was used to identify the factors underlying different trajectories.

1  
2  
3 **Results:** Participants assigned to HF (n=28) were generally classified as positive or  
4 mixed trajectories; those assigned to TAU (n=15) were generally classified as neutral or  
5 negative trajectories. Positive trajectories were characterized by a range of benefits  
6 associated with good-quality, stable housing (e.g., reduced substance use, greater social  
7 support), positive expressions of identity, and the willingness to self-reflect. Negative,  
8 neutral and mixed trajectories were characterized by hopelessness (“things will never get  
9 better”) related to continued hardship (e.g., eviction, substance use problems), perceived  
10 failures, and loss.  
11  
12  
13  
14  
15  
16  
17  
18  
19  
20  
21

22  
23 **Conclusions:** HF is associated with positive trajectories of recovery among homeless  
24 adults with mental illness. Those who did not receive housing or support continued to  
25 struggle across a wide range of life domains. Findings are discussed with implications for  
26 addressing services and broader social change in order to benefit this marginalized  
27 population.  
28  
29  
30  
31  
32  
33  
34  
35  
36  
37  
38  
39  
40  
41  
42  
43  
44  
45  
46  
47  
48  
49  
50  
51  
52  
53  
54  
55  
56  
57  
58  
59  
60

## ARTICLE SUMMARY

### Article focus

- Trajectories of recovery among homeless adults with mental illness over 18 months of participation in a randomized controlled trial where participants received Housing First (HF) with intensive support services or treatment as usual (TAU; no housing or supports through the study).
- Narrative interviews (n=43) were conducted at baseline and at 18 months follow-up and were classified as positive, negative, mixed or neutral trajectories of recovery.
- Thematic analysis was used to examine the factors that contribute to different trajectories of recovery.

### Key messages

- Narratives from participants assigned to HF were predominantly classified as positive trajectories; no HF participants' narratives were classified as negative trajectories. Narratives from participants assigned to TAU were predominantly classified as negative or neutral trajectories.

- Positive trajectories were characterized by the “ontological security” of obtaining good-quality housing, and included reduced substance use, efforts to expand social supports, positive expressions of identity, and the willingness to self-reflect.
- Negative, neutral and mixed trajectories were characterized by hopelessness related to continued hardship including recent eviction, substance use problems, perceived failures, loss and social isolation.

### **Strengths and limitations of this study**

- This study is the first to use longitudinal, narrative data from adults with mental illness who were randomly assigned to HF or TAU. Additional strengths include specific measures to enhance trustworthiness of the data.
- Despite using multiple, independent coders, classifying trajectories among such a marginalized population is challenging given the volatility in people’s lives.

## Introduction

The co-occurrence of homelessness and mental illness is associated with a range of health, social and systemic challenges that make goals of residential stability and recovery difficult.<sup>1-3</sup> As a result, many homeless individuals with mental illness appear to be caught in a “revolving door” of institutional care, shelter use, substandard accommodation, and living on the streets.<sup>4-6</sup> In an effort to interrupt this cycle, *Housing First* (HF) was developed to reach the “hardest to house.”<sup>3</sup> HF provides immediate access to independent, market-lease apartments without requirements around sobriety or engagement in treatment. HF has also been offered in congregate settings where all or a majority of tenants are program participants.<sup>7</sup> In both settings, HF participants are provided access to treatment and services, but choose their level of participation. A growing body of research on HF has documented positive outcomes including residential stability,<sup>8,9</sup> quality of life,<sup>10</sup> community integration,<sup>11</sup> and client satisfaction.<sup>12</sup>

Over the past 20 years, qualitative studies have examined homeless people’s subjective experience of life on the streets and in shelters,<sup>13</sup> mental illness,<sup>14</sup> substance use,<sup>15,16</sup> various health and social services,<sup>17,18</sup> and different types of housing.<sup>8,19,20</sup> However, few qualitative studies have followed homeless adults over time, before and after receiving supported housing<sup>20</sup> or have examined what factors influence different trajectories of recovery.<sup>21</sup> Prior research on supported housing has emphasized the importance of personal and external resources resulting from safe and secure housing<sup>20</sup> and challenges around social isolation, substance use, and stigma.<sup>14,19</sup> Several studies have reported that substance use disorders are predictive of lower housing stability regardless of residence type.<sup>22,23</sup> For the most part, prior research on trajectories

1  
2  
3 among a variety of marginalized populations has followed variable-centered (e.g., cluster  
4 analysis and other quantitative techniques) rather than person-centered strategies, thereby  
5 losing the focus on how multiple events, conditions and experiences contribute to an  
6 individual's perception and experience.<sup>24</sup> Moreover, few qualitative studies have been  
7 conducted alongside randomized controlled trials.<sup>25,26</sup>

8  
9  
10  
11  
12  
13  
14  
15  
16 The Vancouver At Home Study is part of a multi-site, mixed-methods randomized  
17 controlled trial to examine the effectiveness of HF interventions compared to existing  
18 services (Treatment as Usual; TAU) among homeless adults with mental illness.<sup>26-28</sup> The  
19 current study focuses on narrative data from the Vancouver site, which includes a high  
20 proportion of participants who met criteria for substance dependence, and is the only site  
21 that implemented HF in a congregate setting as well as in independent apartments. The  
22 current study uses thematic analysis to examine participant narratives before and 18  
23 months after random assignment to HF or TAU (no housing or supports provided by the  
24 study) and seeks to identify positive, negative, mixed or neutral trajectories of recovery  
25 and the factors related to different trajectories.

## 36 37 38 39 40 **Methods**

### 41 42 *Participants and Sampling*

43  
44  
45 Eligibility criteria included legal adult status (over 19 years of age), presence of a  
46 current mental disorder based on a semi-structured interview, and being absolutely  
47 homeless or precariously housed.<sup>27</sup> Participants were recruited through referral from a  
48 variety of agencies that serve the homeless. All participants met with a trained research  
49 interviewer who explained procedures, confirmed study eligibility, and obtained  
50 informed consent. Eligible participants completed a series of baseline questionnaires,  
51  
52  
53  
54  
55  
56  
57  
58  
59  
60

1  
2  
3 and were differentiated into two groups, High Need (HN) or Moderate Need (MN), based  
4  
5 on the complexity and severity of their needs.<sup>27</sup> HN participants were randomized to one  
6  
7 of three study arms: (1) HF (independent apartments) with Assertive Community  
8  
9 Treatment (ACT); (2) Congregate Housing with on-site support (CONG); and (3)  
10  
11 Treatment as Usual (HNTAU) which provided no additional housing or support services  
12  
13 beyond what was available in the community. MN participants were randomized to one  
14  
15 of two study arms: (1) HF (independent apartments) with Intensive Case Management  
16  
17 (ICM); and (2) MNTAU. Participants in the present study were both randomly and  
18  
19 purposively selected from the larger study sample, in an effort to represent differences  
20  
21 across gender, ethnicity, duration of homelessness, and degree of functional impairment.  
22  
23 Within one month of enrollment in the larger study, selected participants were asked to  
24  
25 participate in a “personal story interview.” Participation was voluntary, and two out of 54  
26  
27 participants declined. The current study is based on narrative interviews from 43  
28  
29 participants who were interviewed within one month of recruitment and re-interviewed  
30  
31 18 months later. Reasons for loss to follow-up include: death (1), refused participation  
32  
33 (1), incarcerated (2), moved out of town (1), and unable to locate (4). Baseline interviews  
34  
35 (n=52) included 32 HF participants and 20 TAU participants; follow-up interviews  
36  
37 (n=43) included 28 HF participants and 15 TAU participants.  
38  
39  
40  
41  
42  
43  
44  
45

### 46 ***Data Collection***

47  
48  
49 Four research assistants and one peer interviewer conducted the narrative  
50  
51 interviews. Interviews lasted from one to two hours and were conducted at a setting  
52  
53 chosen by the participant, usually a community agency or the project field office. All  
54  
55 participants gave informed consent and received \$30 upon completion of each interview.  
56  
57  
58  
59  
60

1  
2  
3 Institutional Research Ethics Board approval was obtained from Simon Fraser University  
4  
5 and the University of British Columbia.  
6  
7

8  
9 Using a semi-structured interview format, participants worked with interviewers  
10  
11 at baseline to co-construct a personal story highlighting (a) their pathway into  
12  
13 homelessness; (b) experiences of being homeless or inadequately housed; (c) experiences  
14  
15 around first learning they had a mental illness and obtaining help for their illness; and (d)  
16  
17 key life events. The 18-month follow-up interview focused on changes since the first  
18  
19 interview in the areas of typical day, housing, service use, experience of community,  
20  
21 social ties, hopes for the future, and key life events. Interviews were audio recorded and  
22  
23 transcribed verbatim.  
24  
25  
26  
27

### 28 29 *Data Analysis*

30  
31  
32 Each participant's baseline and 18-month follow-up interviews were compared  
33  
34 and the overall trajectory was categorized as 'positive,' 'negative,' 'mixed' or 'neutral.'  
35  
36 Categorizations were based on 22 domains including housing stability, typical day,  
37  
38 mental and physical health, substance use, criminal justice activity, social interactions,  
39  
40 hopes for the future, willingness to introspect, and interviewer observations. Each  
41  
42 transcript was coded for positive, negative, mixed or no change on each domain. If the  
43  
44 number of positive domains clearly outnumbered the negative, the trajectory was coded  
45  
46 as "positive." Conversely, if the number of negative domains clearly outnumbered  
47  
48 positive, the trajectory was coded as "negative." If the number of negative and positive  
49  
50 domains were roughly equal, the trajectory was categorized as "mixed;" and if no clear  
51  
52 change was observed over time in the majority of domains, the trajectory was categorized  
53  
54  
55  
56  
57  
58  
59  
60



1  
2  
3 as “neutral.” Although we structured coding by using 22 domains, scientific/clinical  
4  
5 judgment and discussion among coders and interviewers was a key part of the analytic  
6  
7 process.<sup>22</sup> Approximately three-quarters of the interviews clearly fell into one category,  
8  
9 while the remainder were more complex and required collaborative consensus.  
10  
11

12  
13  
14 Thematic analysis was used to examine the interview transcripts in relation to  
15  
16 factors that contribute to positive, negative, or neutral trajectories. Our approach reflects  
17  
18 ideas brought to the data set from the research questions and existing literature (i.e.,  
19  
20 deductive), as well as themes that emerge from the data (i.e., inductive).<sup>29,30</sup> According to  
21  
22 this approach, emphasis is primarily on the content of the text (*what* is said) rather than  
23  
24 on structural or discourse analysis (*how* it is said); however, we also considered the  
25  
26 emotional tone of the interviews and field notes.  
27  
28

29  
30  
31 The interviewing team met four times during the early phase of thematic analysis to  
32  
33 co-code and discuss emergent themes in the narratives. Initial codes and themes were  
34  
35 based on interview questions; for example, the question “How have your relationships  
36  
37 with people changed?” elicited the code ‘developing trust’ and a preliminary theme of  
38  
39 ‘wanting deeper social connections vs. isolating.’ Subsequently, the first author  
40  
41 independently coded all transcripts line-by-line, classified trajectories, and identified  
42  
43 repeated or similar codes to build a set of overarching themes;<sup>29,30</sup> the second and third  
44  
45 authors followed the same process for half of the transcripts. Thus, all transcripts were  
46  
47 independently coded by at least two people. After a thorough review of the transcripts  
48  
49 and field notes, conceptual impressions were integrated into key thematic areas. At this  
50  
51 point, themes and initial interpretations were shared with field interviewers and any  
52  
53 coding differences were resolved by group consensus. Five audio files from both the  
54  
55  
56  
57  
58  
59  
60

1  
2  
3 baseline and follow-up interviews were reviewed by an external researcher who was  
4  
5 familiar with the interview guide. The audio files were checked against their respective  
6  
7 transcripts for accuracy and quality.  
8  
9

## 10 11 **Results**

### 12 13 *Sample characteristics*

14  
15  
16  
17  
18 Demographic characteristics at baseline for participants who completed both  
19  
20 narrative interviews (baseline and 18 months) are presented in Table 1. No significant  
21  
22 differences were observed among baseline demographic characteristics for the baseline  
23  
24 and the follow-up samples. As noted in Table 1, the age of the follow-up sample ranged  
25  
26 from 21 to 66 years (mean = 43 years) and included 25 men (58%), 16 women (37%),  
27  
28 and 2 (5%) transgendered individuals. At baseline, the mean lifetime duration of  
29  
30 homelessness was 6 years and 30% had completed high school. The most commonly  
31  
32 identified mental disorders among the sample were Psychotic Disorder (49%), Major  
33  
34 Depressive Episode (49%), and Substance Dependence (67%).  
35  
36  
37  
38  
39

40 [Insert Table 1 about here]  
41  
42

### 43 **Classification of trajectories**

44  
45  
46 Narratives from HF participants (n=28) were predominantly classified as positive  
47  
48 (n=17) or mixed (n=9) trajectories over the 18-month study period; two narratives were  
49  
50 classified as neutral; and none were negative (see Table 2). Narratives from TAU  
51  
52 participants (n=15) were typically classified as negative (n=5) or neutral (n=5)  
53  
54 trajectories, with the remaining trajectories divided between the positive and mixed  
55  
56  
57  
58  
59  
60

1  
2  
3 categories. Of note, only two TAU participants obtained good-quality housing during the  
4  
5 study, and both participants' narratives were classified as positive.  
6  
7

8  
9 [Insert Table 2 about here]  
10

11  
12 ***Key themes: positive trajectories***  
13

14  
15 Two related but distinct themes primarily contributed to positive trajectories: (1)  
16 housing as a stable foundation for change across a variety of domains; and (2) the  
17  
18 expression of positive aspects of one's identity.  
19  
20  
21

22  
23 *Theme 1: Housing as a secure and stable foundation.* Positive trajectories were  
24 characterized by the benefits associated with good-quality, stable housing which affected  
25 many areas of people's lives (e.g., health, substance use, social ties, identity, financial,  
26  
27 leisure time). These benefits reflected a sense of "ontological security"<sup>31</sup> that shifted the  
28 way people thought about themselves and others, and allowed them to take steps toward  
29  
30 positive change. For example, since running away from home in adolescence, Alice had  
31 lived intermittently in shelters, hotels, and with acquaintances. She described  
32  
33 longstanding fear and hypervigilance that had shifted to a growing sense of freedom and  
34 security since receiving stable housing: *"I was at the beach, and I was running towards  
35 the water, and I was jumping in. ... I was just jumping in the water. I took all my clothes  
36 off, and I had my bathing suit on, and I was like, 'Whoo-hoo!' And then I walked home in  
37 my bare feet, laid on the bed, and I was like, 'Ahh. Heaven.'"*  
38  
39  
40  
41  
42  
43  
44  
45  
46  
47  
48  
49  
50

51  
52 Several HF participants achieved a period of stable housing (typically for six to  
53  
54 12 months) but had since experienced eviction. The experience of losing housing  
55  
56 contributed to different trajectories depending on the timing, context and interpretation of  
57  
58  
59  
60

1  
2  
3 the experience. Among positive trajectories, eviction was perceived as a turning point  
4 and a significant learning experience. Given the project's commitment to re-housing,  
5 many HF participants were able to learn from their mistakes, particularly around how to  
6 set boundaries, manage substance use, and challenge expectations around the inevitability  
7 of failure.  
8  
9  
10  
11  
12  
13

14  
15 *Theme 2: Expression of positive identity.* Many housed participants struggled to  
16 let go of their homeless identity, especially those who had been homeless for long  
17 periods. Finding and exploring opportunities that promoted the development of a positive  
18 personal and social identity, independent of homelessness, were often present among  
19 positive trajectories. For example, one participant joined a community choir; another  
20 coached a softball team for homeless people; several others were training to become peer  
21 support workers. However, it was also important for many participants to maintain links  
22 with their old identities, neighbourhoods, and routines. Among positive trajectories,  
23 there appeared to be a gradual process of shifting towards new social roles, networks and  
24 routines. The expression of positive identity was related to a willingness to introspect  
25 and reflect on one's experience and lessons learned which was often present in positive  
26 trajectories. For example, after losing his job and marriage, Tom (positive trajectory)  
27 started using drugs and alcohol more heavily and developed intense paranoia and  
28 auditory hallucinations. For two years prior to the baseline interview, he cycled through  
29 shelters, transitional housing, and the corrections system. After 18 months of HF, his  
30 narrative reflected a willingness to introspect on his recovery to date and a stronger sense  
31 of self: *"I'm getting more solid in my thinking and in terms of what I want. Like a better  
32 relationship with my kids. ... I have everything I need right now and the choices are my  
33  
34  
35  
36  
37  
38  
39  
40  
41  
42  
43  
44  
45  
46  
47  
48  
49  
50  
51  
52  
53  
54  
55  
56  
57  
58  
59  
60*

1  
2  
3 own. *I have to live with them, good or bad. So, there's a level of maturity that's*  
4  
5  
6 *happening.*"

7  
8  
9 ***Key themes: negative, neutral and mixed trajectories***

10  
11  
12 Three major themes primarily contributed to negative, neutral and mixed  
13  
14 trajectories: (1) feeling like things will never change, including continued poverty,  
15  
16 instability, and substance use; (2) perceived failure and disappointment, resulting in a  
17  
18 sense of learned helplessness; and (3) loss of one's health and loved ones.

19  
20  
21 *Theme 1: Things will never change.* Negative, neutral and mixed trajectories  
22  
23 were typically characterized by increasing or continued hardship and instability across  
24  
25 multiple domains, resulting in feelings of social devaluation, feeling trapped, and a  
26  
27 profound lack of autonomy (as described in previous analysis of our baseline  
28  
29 narratives).<sup>32</sup> In addition, the emotional tone of negative and neutral trajectories was often  
30  
31 flat with little elaboration or detail provided around experiences. Negative and neutral  
32  
33 trajectories, in particular, were often pervaded by a sense of resignation and hopelessness.  
34  
35 For example, at baseline, Alex (negative trajectory) had been living on the streets and in  
36  
37 rooming houses for 10 years. For short periods, he was able to obtain low-income  
38  
39 housing; however, he described persistent depression and frequent substance use, which  
40  
41 made it difficult for him to maintain housing. At follow-up, he described a series of  
42  
43 negative interactions with the justice, health, and social housing systems, which left him  
44  
45 feeling increasingly demoralized and suicidal: "*I got beat up at the hospital by two*  
46  
47 *security guards. They treat you like an animal. The nurses assume that you're just high.*  
48  
49 *...They discharged me to a hotel. I left the next day. It was noisy, bug-infested, full of*  
50  
51 *drugs.*" Alex admitted that his drug and alcohol use has increased, and he started selling  
52  
53  
54  
55  
56  
57  
58  
59  
60

1  
2  
3 drugs: *“I’m just going in circles. It feels like I’m trapped. Down here, I’ll always be an*  
4  
5 *addict.”*  
6  
7

8  
9 *Theme 2: Perceived failure and disappointment.* Failed attempts at change across  
10 multiple life domains were prevalent in the narratives. Participants often made genuine  
11 efforts to create change, but encountered personal and/or systemic obstacles such that  
12 they did not follow through with the change. Recent or prolonged loss of housing and  
13 contact with family, often due to relapse into substance use, were the more common  
14 perceived failures. For example, Clara (mixed trajectory), a 54-year-old woman, had been  
15 living on the streets and in precarious housing situations for 20 years prior to receiving  
16 HF. She was stably housed for 18 months and had reconnected with her daughter.  
17 However, she was struggling with the effects of a recent concussion, a longstanding  
18 heroin addiction, and the loss of past opportunities. *“You know, people kept saying,*  
19 *“You’re so lucky!” [to receive housing] Well, yeah, I’m lucky. But I’m stupid. I could*  
20 *have had something like this 20 years ago. I put myself where I am. Nobody put me here.*  
21 *You know? I know that. I don’t like it, but [shrugs].”*  
22  
23  
24  
25  
26  
27  
28  
29  
30  
31  
32  
33  
34  
35  
36  
37  
38  
39

40 *Theme 3: Loss of one’s health and loved ones.* Many participants experienced  
41 significant physical health problems in addition to mental illness. Limited mobility and  
42 physical pain were daily experiences for most participants. Deaths and ruptures in key  
43 attachment relationships, including trauma and abuse, were also very common and  
44 resulted in a profound sense of isolation for many participants. The physical and  
45 psychological pain associated with recent loss(es) colored participants’ perceptions of  
46 change and well-being across a range of domains and seemed to confirm an expectation  
47 of failure and low self-worth. Many participants, but especially those with negative and  
48  
49  
50  
51  
52  
53  
54  
55  
56  
57  
58  
59  
60

1  
2  
3 neutral trajectories, described being very socially isolated and disconnected from  
4  
5 community. For example, James (neutral trajectory) is a 46-year-old man with a long  
6  
7 history of homelessness, severe mental illness and substance use who was assigned to  
8  
9 HNTAU. He described a struggle between wanting deeper social ties but also wanting to  
10  
11 protect himself: *“I haven’t really met people that were worth spending that type of*  
12  
13 *energy on. I know that sounds a little cold, but people will – even unknowingly – suck the*  
14  
15 *life out of you, you know? And I have to be really careful with my energy because I get*  
16  
17 *very drained and I’ve spent a little bit more time understanding what stress can actually*  
18  
19 *do, like mentally, physically and spiritually. And my life has been extremely stressful and*  
20  
21 *traumatic. I don’t want to go through that.”*  
22  
23  
24  
25  
26  
27

## 28 Discussion

29  
30  
31 This study is the first to use longitudinal, narrative data from homeless adults with  
32  
33 mental illness who were randomly assigned to HF or TAU (no housing or supports  
34  
35 provided through the study) to examine trajectories of recovery, and is an important  
36  
37 contribution to the growing literature on HF. Narratives from participants assigned to HF  
38  
39 reflected positive, mixed or neutral trajectories over the 18-month study period; none  
40  
41 were classified as negative. By contrast, positive trajectories were rare among TAU  
42  
43 participants (three out of 15). In general, TAU narratives reflected negative or neutral  
44  
45 trajectories; participants continued to experience numerous challenges related to housing,  
46  
47 health, substance use, trauma, and marginalization that culminated in increasingly poor  
48  
49 functioning and feelings of hopelessness.  
50  
51  
52  
53  
54  
55  
56  
57  
58  
59  
60

1  
2  
3 Positive change was primarily related to obtaining good quality housing.<sup>33</sup> The  
4 sense of security and positive self-worth resulting from good-quality, stable housing  
5 allowed individuals to explore new daily routines, reduce substance use and antisocial  
6 behaviour, expand social roles and networks, and provided a safe space to reflect on  
7 one's experiences. The breadth of domains affected by stable housing supports the  
8 construct of ontological security - the psychosocial sense of safety and stability which  
9 often accompanies permanent housing.<sup>31,34</sup> Past research has shown that homeless adults  
10 with mental illness who receive HF manifest greater ontological security than those living  
11 in transitional housing.<sup>31</sup> Our findings support a life course approach to recovery from  
12 homelessness and mental illness which considers the complex effects of cumulative  
13 adversity. The safety, security and ideological construct of 'home' is a critical  
14 foundation upon which the recovery journey is based.<sup>31</sup>

15  
16  
17  
18  
19  
20  
21  
22  
23  
24  
25  
26  
27  
28  
29  
30  
31  
32  
33 Negative, neutral, and mixed trajectories were characterized by continued  
34 hardship and heavy substance use, perceived failures and disappointments, loss, and  
35 social isolation. These struggles resulted in a pervasive sense of social devaluation and  
36 helplessness, as described in previous analysis of the baseline interviews.<sup>32</sup> Trauma  
37 theory and research may provide a useful lens through which to view and understand the  
38 experience of and attempts to exit homelessness in at least three respects.<sup>35</sup> First,  
39 becoming homeless (and repeatedly thereafter) may itself produce symptoms of trauma.  
40 Second, the ongoing experience of homelessness (loss of safety, predictability, control)  
41 may erode coping abilities. Finally, homelessness may exacerbate trauma symptoms  
42 among people with preexisting histories of victimization. In our narratives, cumulative  
43  
44  
45  
46  
47  
48  
49  
50  
51  
52  
53  
54  
55  
56  
57  
58  
59  
60



1  
2  
3 trauma and adversity was often the common factor underlying barriers to recovery such  
4  
5 as psychiatric symptoms, substance abuse, and social isolation.  
6  
7

8  
9  
10 Similar to prior qualitative research, mental illness was not a dominant theme in  
11  
12 our narratives despite direct questions on the topic.<sup>21,33</sup> Psychiatric symptoms and related  
13  
14 stigma were a source of distress and impairment for most participants; however, it was  
15  
16 often hard to disentangle the effects of cumulative adversity, substance abuse and mental  
17  
18 illness. Most participants had experienced repeated, longstanding trauma and  
19  
20 marginalization, resulting in a level of disorganization that does not fit traditional  
21  
22 diagnostic classification systems. For many participants, heavy substance use started in  
23  
24 early adolescence and continued into adulthood as means of coping with trauma,  
25  
26 homelessness, psychological distress, and as a way to “fit in.” Participants with long  
27  
28 histories of homelessness and substance dependence tended to be more entrenched in the  
29  
30 homeless identity and subculture, and had more difficulty adjusting to housing.<sup>21,33</sup> A  
31  
32 better understanding of the timing, sequence and context for changes in complex  
33  
34 trajectories of recovery, including homelessness, mental illness, and substance use, is still  
35  
36 needed.  
37  
38  
39  
40  
41  
42  
43

44 Isolation was a barrier to recovery for many participants, including those who  
45  
46 received HF. The structural and individual factors that contributed to homelessness (i.e.,  
47  
48 poverty and lack of resources, poor mental and physical health, poor coping skills, lack of  
49  
50 meaningful activities) continued to impact all participants’ daily lives.<sup>1</sup> Henwood et al.  
51  
52 suggest that past trauma may lead individuals to view the world as dangerous and  
53  
54 unpredictable, thus leading some people to seek the perceived comfort of isolating in an  
55  
56  
57  
58  
59  
60

1  
2  
3 apartment.<sup>34</sup> This isolation could be a necessary consolidation phase before more  
4  
5 substantial recovery can occur.<sup>21</sup> In our narratives, isolation was often a longstanding  
6  
7 way of being; however, participants also had few opportunities to develop new daily  
8  
9 routines from which to develop a sense of well-being and identity.<sup>15</sup> Some participants  
10  
11 alluded to tradeoffs between the safety of cohesive social ties and the flexibility of weak  
12  
13 ties. It should also be noted that social isolation is a broader societal issue that is widely  
14  
15 prevalent. While isolation is clearly heightened among marginalized populations, it is  
16  
17 interesting that very few participants in our study who received HF left to return to their  
18  
19 old neighbourhoods.  
20  
21  
22  
23

24  
25 Our 18-month follow-up period provided most participants with only initial  
26  
27 opportunities for recovery. Many participants who demonstrated positive trajectories had  
28  
29 experienced either an eviction or a planned move from their original housing placement.  
30  
31 Improvements in domains such as substance use, mental illness, and social support were  
32  
33 often very fragile. Our findings highlight the importance of supporting homeless people  
34  
35 with mental disorders through stages of change that include relapse, eviction and re-  
36  
37 housing. Oftentimes, in hindsight, these moves and the support received from service  
38  
39 teams were significant turning points and learning experiences for participants.  
40  
41  
42 Narratives across all trajectory groups revealed that recovery and reclaiming stability in  
43  
44 housing and health, among other domains, is very difficult work -- slips and relapses are  
45  
46 common. Collectively, the narratives highlight the tremendous challenge for people to  
47  
48 move indoors and into community after years and sometimes decades outside, and often  
49  
50 longer as marginalized citizens.  
51  
52  
53  
54  
55  
56  
57  
58  
59  
60

1  
2  
3 For our participants, recovery requires attention to the consequences of cumulative  
4 adversity, particularly previous trauma, and the ongoing stressors of poverty and social  
5 isolation. Our findings revealed that progress in recovery reflected the stages of change  
6 model.<sup>36</sup> change was gradual and cumulative, setbacks were often sudden and  
7 devastating, and maintaining gains often meant being ‘stuck’ with few options for  
8 positive change. Rather than a clinical approach to recovery, a whole-person approach  
9 that takes into account experiences of cumulative trauma, marginalization, and individual  
10 beliefs and expectations around change is needed.<sup>33</sup>  
11  
12  
13  
14  
15  
16  
17  
18  
19  
20  
21  
22

### 23 *Limitations*

24  
25 The narratives in this study were affected by participants’ recent circumstances;  
26 however, our analysis relied on two different time points and also incorporated field  
27 notes. Classifying trajectories is challenging given the volatility and multidimensionality  
28 of people’s lives.<sup>21</sup> Neutral and mixed trajectories were inherently more variable than  
29 positive and negative trajectories. For example, neutral trajectories could reflect a  
30 continued negative path or a continued pattern of positive and negative (mixed)  
31 experiences. Mixed trajectories were often reflective of a tumultuous pattern of positive  
32 and negative experiences that could not be clearly categorized as positive or negative.  
33  
34 However, each category contained exemplar cases which were easier to code and other  
35 cases (about one-quarter) that were more complex. Coding complex cases requires a  
36 collaborative consensus-based approach.<sup>24</sup> Finally, given the qualitative and exploratory  
37 nature of this research, we caution against conclusions based on the type of HF received  
38 (independent vs. congregate housing) or comparisons of HF and TAU as the sample sizes  
39 within different housing types are small.  
40  
41  
42  
43  
44  
45  
46  
47  
48  
49  
50  
51  
52  
53  
54  
55  
56  
57  
58  
59  
60

### ***Future Directions***

Future qualitative research should examine the trajectories and themes identified in our study in more detail and over longer periods of time. For example, we found the expansion or contraction of social roles greatly affected participants' identities, and positive shifts in identity were facilitated by HF. However, this shift appeared more difficult for those who were invested in a homeless lifestyle. The process of establishing a new sense of self and a sense of belonging among different requires more investigation.

Our analysis demonstrates that many homeless adults with mental illness who receive good quality, stable housing with intensive supports (Housing First) are able to make significant positive change over 18 months. The sense of security and confidence related to stable housing is critical for supporting recovery across a variety of life domains. However, systemic changes at broader socio-political levels are also need to address issues related to poverty and homelessness.<sup>13,15</sup> Social change is needed to create opportunities for marginalized people to be included in communities and to confront poverty and social inequity.<sup>32</sup>

### **Acknowledgements**

Thanks to Nancy Laliberte, Allison Laing, Arianna Kennedy, and Melinda Markey who conducted the interviews with participants; and Verena Strehlau, Sindi Addorisio, Bernd Mueller, Bijan Nassiri and Jeff Lawlor who helped locate participants. The authors also thank the At Home/Chez Soi Project collaborative at national and local levels. We reserve particular thanks to the women and men who participated in our study, and who provided us with details of their lives and experiences.

## Funding

Funded by the Mental Health Commission of Canada; Health Canada. The views expressed herein solely represent the authors.

## Author Contributions

MP drafted the manuscript, oversaw implementation of the interviews, and coded all the interviews. SR, LC and JS coded subsets of the interviews. SR transcribed all the interviews. JS was the principal investigator. All authors contributed to the final manuscript.

## References

- 1 Draine J, Salzer MS, Culhane DP, *et al.* Role of Social Disadvantage in Crime, Joblessness, and Homelessness Among Persons With Serious Mental Illness. *Psychiatric Services* 2002;**53**:565–73.
- 2 Kertesz SG, Crouch K, Milby JB, *et al.* Housing first for homeless persons with active addiction: are we overreaching? *Milbank Q* 2009;**87**:495–534.
- 3 Tsemberis S, Eisenberg RF. Pathways to Housing: Supported Housing for Street-Dwelling Homeless Individuals With Psychiatric Disabilities. *Psychiatric Services* 2000;**51**:487–93.
- 4 Culhane DP, Metraux S, Hadley TR. The impact of supportive housing for homeless people with severe mental illness on the utilization of the public health, corrections, and emergency shelter systems: The New York-New York Initiative. *Housing Policy Debate* 2002;**13**:107–63.
- 5 Davis L, Fulginiti A, Kriegel L, *et al.* Deinstitutionalization? Where Have All the People Gone? *Curr Psychiatry Rep*; **14**:259–69.
- 6 Hopper K, Jost J, Hay T, *et al.* Homelessness, severe mental illness, and the institutional circuit. *Psychiatric Services* 1997;**48**:659–65.
- 7 Levitt AJ, Jost JJ, Mergl KA, *et al.* Impact of Chronically Street Homeless Tenants in Congregate Supportive Housing. *American Journal of Orthopsychiatry* 2012;**82**:413–20.
- 8 Gilmer TP, Stefancic A, Ettner SL, *et al.* Effect of Full-Service Partnerships on Homelessness, Use and Costs of Mental Health Services, and Quality of Life Among Adults With Serious Mental Illness Homelessness Services in Mentally Ill Adults. *Arch Gen Psychiatry* 2010;**67**:645–52.
- 9 Gulcur L, Stefancic A, Shinn M, *et al.* Housing, hospitalization, and cost outcomes for homeless individuals with psychiatric disabilities participating in continuum of care and housing first programmes. 2003;**13**:171–86.
- 10 Patterson ML, Moniruzzaman A, Palepu A, *et al.* Housing First improves subjective quality of life among homeless adults with mental illness: 12-month findings from a randomized controlled trial in Vancouver, British Columbia. *Social Psychiatry and Psychiatric Epidemiology* Published Online First: 2013. doi:10.1007/s00127-013-0719-6
- 11 Yanos PT, Felton BJ, Tsemberis S, *et al.* Exploring the role of housing type, neighborhood characteristics, and lifestyle factors in the community integration of formerly homeless persons diagnosed with mental illness. *J Ment Health* 2007;**16**:703–17.

- 12 Siegel C, Samuels J, Tang D-I, *et al.* Tenant Outcomes in Supported Housing and Community Residences in New York City. *Psychiatric Services* 2006;**57**:982–91.
- 13 Hooper K. *Reckoning With Homelessness*. Cornell University Press 2003.
- 14 Forchuk C, Ward-Griffin C, Csiernik R, *et al.* Surviving the tornado of mental illness: psychiatric survivors' experiences of getting, losing, and keeping housing. *Psychiatric Services* 2006;**57**:558–62.
- 15 McNaughton CC. Transitions through homelessness, substance use, and the effect of material marginalization and psychological trauma. *Drugs Edu Prev Pol* 2008;**15**:177–88.
- 16 Tyler KA, Johnson KA. Pathways in and out of substance use among homeless-emerging adults. *Journal of adolescent research* 2006.
- 17 Lipsky M. *Street-Level Bureaucracy: Dilemmas of The Individual In Public Services*. New York: : Russell Sage Foundation 1980.
- 18 Tischler V, Rademeyer A, Vostanis P. Mothers experiencing homelessness: mental health, support and social care needs. *Health Soc Care Community* 2006;**15**:246–53.
- 19 Kirkpatrick H, Byrne C. A narrative inquiry: moving on from homelessness for individuals with a major mental illness. *J Psychiatr Ment Health Nurs* 2009;**16**:68–75.
- 20 Nelson G, Clarke J, Febbraro A, *et al.* A narrative approach to the evaluation of supportive housing: stories of homeless people who have experienced serious mental illness. *Psychiatr Rehabil J* 2005;**29**:98–104.
- 21 Padgett DK, Henwood B, Abrams C, *et al.* Social relationships among persons who have experienced serious mental illness, substance abuse, and homelessness: Implications for recovery. *Am J Orthopsychiatry* 2008;**78**:333–9.
- 22 Fichter MM, Quadflieg N. Intervention effects of supplying homeless individuals with permanent housing: a 3-year prospective study. *Acta Psychiatr Scand* 2006;**113**:36–40.
- 23 Wong Y-LI, Hadley TR, Culhane DP, *et al.* Predicting staying in or leaving permanent supportive housing that serves homeless people with serious mental illness. *US Department of Housing & Urban Development* 2006.
- 24 Singer B, Ryff CD, Carr D, *et al.* Linking Life Histories and Mental Health: A Person-Centered Strategy. *Sociological Methodology* 1998;**28**:1–51.
- 25 Lewin S, Glenton C, Oxman AD. Use of qualitative methods alongside randomised controlled trials of complex healthcare interventions: methodological study. *BMJ* 2009;**339**:b3496–6.

- 1  
2  
3  
4  
5  
6  
7  
8  
9  
10  
11  
12  
13  
14  
15  
16  
17  
18  
19  
20  
21  
22  
23  
24  
25  
26  
27  
28  
29  
30  
31  
32  
33  
34  
35  
36  
37  
38  
39  
40  
41  
42  
43  
44  
45  
46  
47  
48  
49  
50  
51  
52  
53  
54  
55  
56  
57  
58  
59  
60
- 26 Macnaughton EL, Goering PN, Nelson GB. Exploring the Value of Mixed Methods Within the At Home/Chez Soi Housing First Project: A Strategy to Evaluate the Implementation of a Complex Population Health Intervention for People With Mental Illness Who Have Been Homeless. *Can J Public Health* 2012;**103**:eS57–eS63.
- 27 Goering PN, Streiner DL, Adair C, *et al*. The At Home/Chez Soi trial protocol: a pragmatic, multi-site, randomised controlled trial of a Housing First intervention for homeless individuals with mental illness in five Canadian cities. *BMJ Open* 2011;**1**:e000323–3.
- 28 Zabkiewicz DM, Patterson M, Somers JM, *et al*. The Vancouver At Home Study: Overview and Methods of a Housing First Trial Among Individuals Who are Homeless and Living with Mental Illness. *J Clin Trials* 2012.
- 29 Morse JM, Field PA. *Qualitative Research Methods for Health Professionals*. Sage Publications 1995.
- 30 Strauss AL. *Qualitative Analysis for Social Scientists*. Cambridge University Press 1987.
- 31 Padgett DK. There's no place like (a) home: Ontological security among persons with serious mental illness in the United States. *Social Science & Medicine* 2007;**64**:1925–36.
- 32 Patterson ML, Markey MA, Somers JM. Multiple Paths to Just Ends: Using Narrative Interviews and Timelines to Explore Health Equity and Homelessness. *International Journal of Qualitative Methods* 2012;**11**:132–51.
- 33 Padgett DK, Smith BT, Henwood BF, *et al*. Life course adversity in the lives of formerly homeless persons with serious mental illness: context and meaning. *Am J Orthopsychiatry* 2012;**82**:421–30.
- 34 Henwood BF, Hsu H-T, Dent D, *et al*. Transitioning from Homelessness: A “Fresh-Start” Event. *Journal of the Society for Social Work and Research* 2013;**4**. doi:10.5243/jsswr.2010.
- 35 Goodman LA, Saxe L, Harvey M. Homelessness as psychological trauma: Broadening perspectives. *American Psychologist* 1991;**46**:1219–25.
- 36 Prochaska JO, DiClemente CC. *Toward a comprehensive model of change*. Plenum Press 1986.



**Table 1. Demographic characteristics at baseline for the original baseline sample (n=52) and those re-interviewed after 18-months (n=43)**

|                                            | Baseline         |    | 18M follow-up    |    |
|--------------------------------------------|------------------|----|------------------|----|
|                                            | Mean (years)     |    | Mean (years)     |    |
| Age (range, median)                        | 42 (21-66, 42.5) |    | 43 (21-66, 42.1) |    |
| Lifetime duration homeless (range, median) | 5.5 (0.2-33, 3)  |    | 5.9 (0.2-33, 4)  |    |
|                                            | n                | %  | n                | %  |
| Gender                                     |                  |    |                  |    |
| Male                                       | 28               | 54 | 25               | 58 |
| Female                                     | 21               | 40 | 16               | 37 |
| Transgender                                | 3                | 6  | 2                | 5  |
| Race/Ethnicity                             |                  |    |                  |    |
| White                                      | 31               | 60 | 26               | 61 |
| Aboriginal                                 | 12               | 23 | 10               | 23 |
| Mixed/Other                                | 9                | 18 | 7                | 16 |
| Housing Status                             |                  |    |                  |    |
| Absolutely homeless                        | 42               | 81 | 35               | 81 |
| Precariously housed                        | 10               | 19 | 8                | 19 |
| Marital Status                             |                  |    |                  |    |
| Single, never married                      | 31               | 60 | 27               | 63 |
| Divorced/separated/widowed                 | 18               | 35 | 15               | 35 |
| Married/common law/other                   | 3                | 6  | 1                | 2  |
| Have Children under 18 years               | 17               | 33 | 15               | 35 |
| Education                                  |                  |    |                  |    |
| Grade 8 or less                            | 10               | 20 | 10               | 23 |
| Incomplete high school                     | 21               | 40 | 20               | 47 |
| Completed high school                      | 21               | 40 | 13               | 30 |

|                                       |    |    |    |    |
|---------------------------------------|----|----|----|----|
| Mental Disorders                      |    |    |    |    |
| Psychotic Disorder                    | 25 | 48 | 21 | 49 |
| Major Depressive Episode              | 24 | 46 | 21 | 49 |
| Mood Disorder with Psychotic Features | 15 | 29 | 14 | 33 |
| Post-Traumatic Stress Disorder        | 15 | 29 | 12 | 28 |
| Panic Disorder                        | 14 | 27 | 10 | 23 |
| Manic or Hypomanic Episode            | 10 | 19 | 8  | 19 |
| Substance Dependence                  | 33 | 63 | 29 | 67 |
| Alcohol Dependence                    | 11 | 21 | 10 | 23 |

Table 2. Recovery trajectories over 18 months by study arm.

| Study Arm                      | Trajectory Type  |                 |                 |                 |
|--------------------------------|------------------|-----------------|-----------------|-----------------|
|                                | Positive         | Negative        | Mixed           | Neutral         |
| <b>ACT (n=9)</b>               | 6                | 0               | 3               | 0               |
| <b>CONG (n=10)</b>             | 5 <sup>+</sup>   | 0               | 3 <sup>#</sup>  | 2 <sup>^</sup>  |
| <b>HNTAU (n=7)</b>             | 0                | 2               | 1               | 4               |
| <b>ICM (n=9)</b>               | 6                | 0               | 3               | 0               |
| <b>MNTAU (n=8)</b>             | 3                | 3               | 1               | 1               |
| <b><i>HF Total (n=28)</i></b>  | <b><i>17</i></b> | <b><i>0</i></b> | <b><i>9</i></b> | <b><i>2</i></b> |
| <b><i>TAU Total (n=15)</i></b> | <b><i>3</i></b>  | <b><i>5</i></b> | <b><i>2</i></b> | <b><i>5</i></b> |

<sup>+</sup> Two participants left the CONG residence within the first year and were living in supported housing elsewhere.

<sup>#</sup> Two of these participants left the CONG residence within the first year, one of whom was living in supported housing elsewhere and one of whom was living in an SRO.

<sup>^</sup> One of these participants left the CONG residence within the first year and was living in an SRO.

**MANUSCRIPT COVER PAGE**

**TITLE. Trajectories of recovery among homeless adults with mental illness who participated in a randomized controlled trial of Housing First: A longitudinal, narrative analysis**

**AUTHORS:**

Michelle L. Patterson, PhD (corresponding author)

Adjunct Professor

Simon Fraser University

Faculty of Health Sciences

8888 University Drive, Blusson Hall Rm. 11010

Burnaby, British Columbia

V5A 1S6 Canada

[michelle\\_patterson@sfu.ca](mailto:michelle_patterson@sfu.ca)

Tel.: 778-782-5279

Stefanie Rezanoff, MSc

Simon Fraser University

Lauren Currie, MPH

Simon Fraser University

Julian M. Somers, PhD

Associate Professor

Simon Fraser University

**Key words:** homelessness, mental illness, recovery, qualitative

## ABSTRACT

**Objectives:** This study used longitudinal, narrative data to identify trajectories of recovery among homeless adults with mental illness alongside the factors that contribute to positive, negative, mixed or neutral trajectories over time. We expected that participants who received Housing First (HF) would describe more positive trajectories of recovery than those who were assigned to Treatment as Usual (TAU; no housing or support provided through the study).

**Design:** Narrative interview data was collected from participants at baseline and 18 months after random assignment to HF or TAU.

**Setting:** Participants were sampled from the community in Vancouver, British Columbia.

**Participants:** Fifty-four participants were randomly and purposively selected from the larger trial; 52 were interviewed at baseline and 43 were re-interviewed 18 months after randomization.

**Method:** Semi-structured interviews were conducted at both time points. For each participant, paired baseline and follow-up narratives were classified as positive, negative, mixed, or neutral trajectories of recovery, and thematic analysis was used to identify the factors underlying different trajectories.

1  
2  
3 **Results:** Participants assigned to HF (n=28) were generally classified as positive or  
4 mixed trajectories; those assigned to TAU (n=15) were generally classified as neutral or  
5 negative trajectories. Positive trajectories were characterized by a range of benefits  
6 associated with good-quality, stable housing (e.g., reduced substance use, greater social  
7 support), positive expressions of identity, and the willingness to self-reflect. Negative,  
8 neutral and mixed trajectories were characterized by hopelessness (“things will never get  
9 better”) related to continued hardship (e.g., eviction, substance use problems), perceived  
10 failures, and loss.  
11  
12  
13  
14  
15  
16  
17  
18  
19  
20  
21  
22

23 **Conclusions:** HF is associated with positive trajectories of recovery among homeless  
24 adults with mental illness. Those who did not receive housing or support continued to  
25 struggle across a wide range of life domains. Findings are discussed with implications for  
26 addressing services and broader social change in order to benefit this marginalized  
27 population.  
28  
29  
30  
31  
32  
33  
34  
35  
36  
37  
38  
39  
40  
41  
42  
43  
44  
45  
46  
47  
48  
49  
50  
51  
52  
53  
54  
55  
56  
57  
58  
59  
60

## ARTICLE SUMMARY

### Article focus

- Trajectories of recovery among homeless adults with mental illness over 18 months of participation in a randomized controlled trial where participants received Housing First (HF) with intensive support services or treatment as usual (TAU; no housing or supports through the study).
- Narrative interviews (n=43) were conducted at baseline and at 18 months follow-up and were classified as positive, negative, mixed or neutral trajectories of recovery.
- Thematic analysis was used to examine the factors that contribute to different trajectories of recovery.

### Key messages

- Narratives from participants assigned to HF were predominantly classified as positive trajectories; no HF participants' narratives were classified as negative trajectories. Narratives from participants assigned to TAU were predominantly classified as negative or neutral trajectories.

- Positive trajectories were characterized by the “ontological security” of obtaining good-quality housing, and included reduced substance use, efforts to expand social supports, positive expressions of identity, and the willingness to self-reflect.
- Negative, neutral and mixed trajectories were characterized by hopelessness related to continued hardship including recent eviction, substance use problems, perceived failures, loss and social isolation.

### **Strengths and limitations of this study**

- This study is the first to use longitudinal, narrative data from adults with mental illness who were randomly assigned to HF or TAU. Additional strengths include specific measures to enhance trustworthiness of the data.
- Despite using multiple, independent coders, classifying trajectories among such a marginalized population is challenging given the volatility in people’s lives.



## Introduction

The co-occurrence of homelessness and mental illness is associated with a range of health, social and systemic challenges that make goals of residential stability and recovery difficult.<sup>1-3</sup> As a result, many homeless individuals with mental illness appear to be caught in a “revolving door” of institutional care, shelter use, substandard accommodation, and living on the streets.<sup>4-6</sup> In an effort to interrupt this cycle, *Housing First* (HF) was developed to reach the “hardest to house.”<sup>3</sup> HF provides immediate access to independent, market-lease apartments without requirements around sobriety or engagement in treatment. HF has also been offered in congregate settings where all or a majority of tenants are program participants.<sup>7</sup> In both settings, HF participants are provided access to treatment and services, but choose their level of participation. A growing body of research on HF has documented positive outcomes including residential stability,<sup>8,9</sup> quality of life,<sup>10</sup> community integration,<sup>11</sup> and client satisfaction.<sup>12</sup>

Over the past 20 years, qualitative studies have examined homeless people’s subjective experience of life on the streets and in shelters,<sup>13</sup> mental illness,<sup>14</sup> substance use,<sup>15,16</sup> various health and social services,<sup>17,18</sup> and different types of housing.<sup>8,19,20</sup> However, few qualitative studies have followed homeless adults over time, before and after receiving supported housing<sup>20</sup> or have examined what factors influence different trajectories of recovery.<sup>21</sup> Prior research on supported housing has emphasized the importance of personal and external resources resulting from safe and secure housing<sup>20</sup> and challenges around social isolation, substance use, and stigma.<sup>14,19</sup> Several studies have reported that substance use disorders are predictive of lower housing stability regardless of residence type.<sup>22,23</sup> For the most part, prior research on trajectories

1  
2  
3 among a variety of marginalized populations has followed variable-centered (e.g., cluster  
4 analysis and other quantitative techniques) rather than person-centered strategies, thereby  
5 losing the focus on how multiple events, conditions and experiences contribute to an  
6 individual's perception and experience.<sup>24</sup> Moreover, few qualitative studies have been  
7 conducted alongside randomized controlled trials.<sup>25,26</sup>

8  
9  
10  
11  
12  
13  
14  
15  
16 The Vancouver At Home Study is part of a multi-site, mixed-methods randomized  
17 controlled trial to examine the effectiveness of HF interventions compared to existing  
18 services (Treatment as Usual; TAU) among homeless adults with mental illness.<sup>26-28</sup> The  
19 current study focuses on narrative data from the Vancouver site, which includes a high  
20 proportion of participants who met criteria for substance dependence, and is the only site  
21 that implemented HF in a congregate setting as well as in independent apartments. The  
22 current study uses thematic analysis to examine participant narratives before and 18  
23 months after random assignment to HF or TAU (no housing or supports provided by the  
24 study) and seeks to identify positive, negative, mixed or neutral trajectories of recovery  
25 and the factors related to different trajectories.

## 36 37 38 39 40 **Methods**

### 41 42 ***Participants and Sampling***

43  
44  
45 Eligibility criteria included legal adult status (over 19 years of age), presence of a  
46 current mental disorder based on a semi-structured interview, and being absolutely  
47 homeless or precariously housed.<sup>27</sup> Participants were recruited through referral from a  
48 variety of agencies that serve the homeless. All participants met with a trained research  
49 interviewer who explained procedures, confirmed study eligibility, and obtained  
50 informed consent. Eligible participants completed a series of baseline questionnaires,  
51  
52  
53  
54  
55  
56  
57  
58  
59  
60

1  
2  
3 and were differentiated into two groups, High Need (HN) or Moderate Need (MN), based  
4  
5 on the complexity and severity of their needs.<sup>27</sup> HN participants were randomized to one  
6  
7 of three study arms: (1) HF (independent apartments) with Assertive Community  
8  
9 Treatment (ACT); (2) Congregate Housing with on-site support (CONG); and (3)  
10  
11 Treatment as Usual (HNTAU) which provided no additional housing or support services  
12  
13 beyond what was available in the community. MN participants were randomized to one  
14  
15 of two study arms: (1) HF (independent apartments) with Intensive Case Management  
16  
17 (ICM); and (2) MNTAU. Participants in the present study were both randomly and  
18  
19 purposively selected from the larger study sample, in an effort to represent differences  
20  
21 across gender, ethnicity, duration of homelessness, and degree of functional impairment.  
22  
23 Within one month of enrollment in the larger study, selected participants were asked to  
24  
25 participate in a “personal story interview.” Participation was voluntary, and two out of 54  
26  
27 participants declined. The current study is based on narrative interviews from 43  
28  
29 participants who were interviewed within one month of recruitment and re-interviewed  
30  
31 18 months later. Reasons for loss to follow-up include: death (1), refused participation  
32  
33 (1), incarcerated (2), moved out of town (1), and unable to locate (4). Baseline interviews  
34  
35 (n=52) included 32 HF participants and 20 TAU participants; follow-up interviews  
36  
37 (n=43) included 28 HF participants and 15 TAU participants.  
38  
39  
40  
41  
42  
43  
44  
45

### 46 47 ***Data Collection***

48  
49 Four research assistants and one peer interviewer conducted the narrative  
50  
51 interviews. Interviews lasted from one to two hours and were conducted at a setting  
52  
53 chosen by the participant, usually a community agency or the project field office. All  
54  
55 participants gave informed consent and received \$30 upon completion of each interview.  
56  
57  
58  
59  
60

1  
2  
3 Institutional Research Ethics Board approval was obtained from Simon Fraser University  
4  
5 and the University of British Columbia.  
6  
7

8  
9 Using a semi-structured interview format, participants worked with interviewers  
10  
11 at baseline to co-construct a personal story highlighting (a) their pathway into  
12  
13 homelessness; (b) experiences of being homeless or inadequately housed; (c) experiences  
14  
15 around first learning they had a mental illness and obtaining help for their illness; and (d)  
16  
17 key life events. The 18-month follow-up interview focused on changes since the first  
18  
19 interview in the areas of typical day, housing, service use, experience of community,  
20  
21 social ties, hopes for the future, and key life events. Interviews were audio recorded and  
22  
23 transcribed verbatim.  
24  
25  
26  
27

### 28 29 *Data Analysis*

30  
31  
32 Each participant's baseline and 18-month follow-up interviews were compared  
33  
34 and the overall trajectory was categorized as 'positive,' 'negative,' 'mixed' or 'neutral.'  
35  
36 Categorizations were based on 22 domains including housing stability, typical day,  
37  
38 mental and physical health, substance use, criminal justice activity, social interactions,  
39  
40 hopes for the future, willingness to introspect, and interviewer observations. Each  
41  
42 transcript was coded for positive, negative, mixed or no change on each domain. If the  
43  
44 number of positive domains clearly outnumbered the negative, the trajectory was coded  
45  
46 as "positive." Conversely, if the number of negative domains clearly outnumbered  
47  
48 positive, the trajectory was coded as "negative." If the number of negative and positive  
49  
50 domains were roughly equal, the trajectory was categorized as "mixed;" and if no clear  
51  
52 change was observed over time in the majority of domains, the trajectory was categorized  
53  
54  
55  
56  
57  
58  
59  
60

1  
2  
3 as “neutral.” Although we structured coding by using 22 domains, scientific/clinical  
4 judgment and discussion among coders and interviewers was a key part of the analytic  
5 process.<sup>22</sup> Approximately three-quarters of the interviews clearly fell into one category,  
6 while the remainder were more complex and required collaborative consensus.  
7  
8  
9  
10  
11

12  
13  
14 Thematic analysis was used to examine the interview transcripts in relation to  
15 factors that contribute to positive, negative, or neutral trajectories. Our approach reflects  
16 ideas brought to the data set from the research questions and existing literature (i.e.,  
17 deductive), as well as themes that emerge from the data (i.e., inductive).<sup>29,30</sup> According to  
18 this approach, emphasis is primarily on the content of the text (*what* is said) rather than  
19 on structural or discourse analysis (*how* it is said); however, we also considered the  
20 emotional tone of the interviews and field notes.  
21  
22  
23  
24  
25  
26  
27  
28  
29  
30

31 The interviewing team met four times during the early phase of thematic analysis to  
32 co-code and discuss emergent themes in the narratives. Initial codes and themes were  
33 based on interview questions; for example, the question “How have your relationships  
34 with people changed?” elicited the code ‘developing trust’ and a preliminary theme of  
35 ‘wanting deeper social connections vs. isolating.’ Subsequently, the first author  
36 independently coded all transcripts line-by-line, classified trajectories, and identified  
37 repeated or similar codes to build a set of overarching themes;<sup>29,30</sup> the second and third  
38 authors followed the same process for half of the transcripts. Thus, all transcripts were  
39 independently coded by at least two people. After a thorough review of the transcripts  
40 and field notes, conceptual impressions were integrated into key thematic areas. At this  
41 point, themes and initial interpretations were shared with field interviewers and any  
42 coding differences were resolved by group consensus. Five audio files from both the  
43  
44  
45  
46  
47  
48  
49  
50  
51  
52  
53  
54  
55  
56  
57  
58  
59  
60

1  
2  
3 baseline and follow-up interviews were reviewed by an external researcher who was  
4  
5 familiar with the interview guide. The audio files were checked against their respective  
6  
7 transcripts for accuracy and quality.  
8  
9

## 10 11 **Results**

### 12 13 *Sample characteristics*

14  
15  
16  
17  
18 Demographic characteristics at baseline for participants who completed both  
19  
20 narrative interviews (baseline and 18 months) are presented in Table 1. No significant  
21  
22 differences were observed among baseline demographic characteristics for the baseline  
23  
24 and the follow-up samples. As noted in Table 1, the age of the follow-up sample ranged  
25  
26 from 21 to 66 years (mean = 43 years) and included 25 men (58%), 16 women (37%),  
27  
28 and 2 (5%) transgendered individuals. At baseline, the mean lifetime duration of  
29  
30 homelessness was 6 years and 30% had completed high school. The most commonly  
31  
32 identified mental disorders among the sample were Psychotic Disorder (49%), Major  
33  
34 Depressive Episode (49%), and Substance Dependence (67%).  
35  
36  
37  
38

39  
40 [Insert Table 1 about here]  
41  
42

### 43 **Classification of trajectories**

44  
45  
46 Narratives from HF participants (n=28) were predominantly classified as positive  
47  
48 (n=17) or mixed (n=9) trajectories over the 18-month study period; two narratives were  
49  
50 classified as neutral; and none were negative (see Table 2). Narratives from TAU  
51  
52 participants (n=15) were typically classified as negative (n=5) or neutral (n=5)  
53  
54 trajectories, with the remaining trajectories divided between the positive and mixed  
55  
56  
57  
58  
59  
60

1  
2  
3 categories. Of note, only two TAU participants obtained good-quality housing during the  
4  
5 study, and both participants' narratives were classified as positive.  
6  
7

8  
9 [Insert Table 2 about here]  
10

11  
12 ***Key themes: positive trajectories***  
13

14  
15 Two related but distinct themes primarily contributed to positive trajectories: (1)  
16 housing as a stable foundation for change across a variety of domains; and (2) the  
17  
18 expression of positive aspects of one's identity.  
19  
20  
21

22  
23 *Theme 1: Housing as a secure and stable foundation.* Positive trajectories were  
24 characterized by the benefits associated with good-quality, stable housing which affected  
25 many areas of people's lives (e.g., health, substance use, social ties, identity, financial,  
26  
27 leisure time). These benefits reflected a sense of "ontological security"<sup>31</sup> that shifted the  
28 way people thought about themselves and others, and allowed them to take steps toward  
29  
30 positive change. For example, since running away from home in adolescence, Alice had  
31 lived intermittently in shelters, hotels, and with acquaintances. She described  
32  
33 longstanding fear and hypervigilance that had shifted to a growing sense of freedom and  
34 security since receiving stable housing: *"I was at the beach, and I was running towards  
35 the water, and I was jumping in. ... I was just jumping in the water. I took all my clothes  
36 off, and I had my bathing suit on, and I was like, 'Whoo-hoo!' And then I walked home in  
37 my bare feet, laid on the bed, and I was like, 'Ahh. Heaven.'"*  
38  
39  
40  
41  
42  
43  
44  
45  
46  
47  
48  
49  
50

51  
52 Several HF participants achieved a period of stable housing (typically for six to  
53  
54 12 months) but had since experienced eviction. The experience of losing housing  
55  
56 contributed to different trajectories depending on the timing, context and interpretation of  
57  
58  
59  
60

1  
2  
3 the experience. Among positive trajectories, eviction was perceived as a turning point  
4 and a significant learning experience. Given the project's commitment to re-housing,  
5 many HF participants were able to learn from their mistakes, particularly around how to  
6 set boundaries, manage substance use, and challenge expectations around the inevitability  
7 of failure.  
8  
9

10  
11  
12  
13  
14  
15 *Theme 2: Expression of positive identity.* Many housed participants struggled to  
16 let go of their homeless identity, especially those who had been homeless for long  
17 periods. Finding and exploring opportunities that promoted the development of a positive  
18 personal and social identity, independent of homelessness, were often present among  
19 positive trajectories. For example, one participant joined a community choir; another  
20 coached a softball team for homeless people; several others were training to become peer  
21 support workers. However, it was also important for many participants to maintain links  
22 with their old identities, neighbourhoods, and routines. Among positive trajectories,  
23 there appeared to be a gradual process of shifting towards new social roles, networks and  
24 routines. The expression of positive identity was related to a willingness to introspect  
25 and reflect on one's experience and lessons learned which was often present in positive  
26 trajectories. For example, after losing his job and marriage, Tom (positive trajectory)  
27 started using drugs and alcohol more heavily and developed intense paranoia and  
28 auditory hallucinations. For two years prior to the baseline interview, he cycled through  
29 shelters, transitional housing, and the corrections system. After 18 months of HF, his  
30 narrative reflected a willingness to introspect on his recovery to date and a stronger sense  
31 of self: *"I'm getting more solid in my thinking and in terms of what I want. Like a better  
32 relationship with my kids. ... I have everything I need right now and the choices are my  
33  
34  
35  
36  
37  
38  
39  
40  
41  
42  
43  
44  
45  
46  
47  
48  
49  
50  
51  
52  
53  
54  
55  
56  
57  
58  
59  
60*



1  
2  
3 own. *I have to live with them, good or bad. So, there's a level of maturity that's*  
4  
5  
6 *happening.*"

7  
8  
9  
10 ***Key themes: negative, neutral and mixed trajectories***

11  
12  
13 Three major themes primarily contributed to negative, neutral and mixed  
14 trajectories: (1) feeling like things will never change, including continued poverty,  
15 instability, and substance use; (2) perceived failure and disappointment, resulting in a  
16 sense of learned helplessness; and (3) loss of one's health and loved ones.

17  
18  
19  
20  
21  
22  
23 *Theme 1: Things will never change.* Negative, neutral and mixed trajectories  
24 were typically characterized by increasing or continued hardship and instability across  
25 multiple domains, resulting in feelings of social devaluation, feeling trapped, and a  
26 profound lack of autonomy (as described in previous analysis of our baseline  
27 narratives).<sup>32</sup> In addition, the emotional tone of negative and neutral trajectories was often  
28 flat with little elaboration or detail provided around experiences. Negative and neutral  
29 trajectories, in particular, were often pervaded by a sense of resignation and hopelessness.  
30 For example, at baseline, Alex (negative trajectory) had been living on the streets and in  
31 rooming houses for 10 years. For short periods, he was able to obtain low-income  
32 housing; however, he described persistent depression and frequent substance use, which  
33 made it difficult for him to maintain housing. At follow-up, he described a series of  
34 negative interactions with the justice, health, and social housing systems, which left him  
35 feeling increasingly demoralized and suicidal: "*I got beat up at the hospital by two*  
36  
37  
38  
39  
40  
41  
42  
43  
44  
45  
46  
47  
48  
49  
50  
51  
52  
53  
54  
55  
56  
57  
58  
59  
60  
*security guards. They treat you like an animal. The nurses assume that you're just high.*  
*...They discharged me to a hotel. I left the next day. It was noisy, bug-infested, full of*

1  
2  
3 *drugs.*” Alex admitted that his drug and alcohol use has increased, and he started selling  
4  
5  
6 drugs: *“I’m just going in circles. It feels like I’m trapped. Down here, I’ll always be an*  
7  
8 *addict.”*  
9

10  
11 *Theme 2: Perceived failure and disappointment.* Failed attempts at change across  
12  
13 multiple life domains were prevalent in the narratives. Participants often made genuine  
14  
15 efforts to create change, but encountered personal and/or systemic obstacles such that  
16  
17 they did not follow through with the change. Recent or prolonged loss of housing and  
18  
19 contact with family, often due to relapse into substance use, were the more common  
20  
21 perceived failures. For example, Clara (mixed trajectory), a 54-year-old woman, had been  
22  
23 living on the streets and in precarious housing situations for 20 years prior to receiving  
24  
25 HF. She was stably housed for 18 months and had reconnected with her daughter.  
26  
27 However, she was struggling with the effects of a recent concussion, a longstanding  
28  
29 heroin addiction, and the loss of past opportunities. *“You know, people kept saying,*  
30  
31 *“You’re so lucky!” [to receive housing] Well, yeah, I’m lucky. But I’m stupid. I could*  
32  
33 *have had something like this 20 years ago. I put myself where I am. Nobody put me here.*  
34  
35 *You know? I know that. I don’t like it, but [shrugs].”*  
36  
37  
38  
39  
40  
41  
42

43 *Theme 3: Loss of one’s health and loved ones.* Many participants experienced  
44  
45 significant physical health problems in addition to mental illness. Limited mobility and  
46  
47 physical pain were daily experiences for most participants. Deaths and ruptures in key  
48  
49 attachment relationships, including trauma and abuse, were also very common and  
50  
51 resulted in a profound sense of isolation for many participants. The physical and  
52  
53 psychological pain associated with recent loss(es) colored participants’ perceptions of  
54  
55 change and well-being across a range of domains and seemed to confirm an expectation  
56  
57  
58  
59  
60

1  
2  
3 of failure and low self-worth. Many participants, but especially those with negative and  
4  
5 neutral trajectories, described being very socially isolated and disconnected from  
6  
7 community. For example, James (neutral trajectory) is a 46-year-old man with a long  
8  
9 history of homelessness, severe mental illness and substance use who was assigned to  
10  
11 HNTAU. He described a struggle between wanting deeper social ties but also wanting to  
12  
13 protect himself: *“I haven’t really met people that were worth spending that type of*  
14  
15 *energy on. I know that sounds a little cold, but people will – even unknowingly – suck the*  
16  
17 *life out of you, you know? And I have to be really careful with my energy because I get*  
18  
19 *very drained and I’ve spent a little bit more time understanding what stress can actually*  
20  
21 *do, like mentally, physically and spiritually. And my life has been extremely stressful and*  
22  
23 *traumatic. I don’t want to go through that.”*  
24  
25  
26  
27  
28  
29  
30  
31  
32  
33  
34

## 35 Discussion

36  
37  
38 This study is the first to use longitudinal, narrative data from homeless adults with  
39  
40 mental illness who were randomly assigned to HF or TAU (no housing or supports  
41  
42 provided through the study) to examine trajectories of recovery, and is an important  
43  
44 contribution to the growing literature on HF. Narratives from participants assigned to HF  
45  
46 reflected positive, mixed or neutral trajectories over the 18-month study period; none  
47  
48 were classified as negative. By contrast, positive trajectories were rare among TAU  
49  
50 participants (three out of 15). In general, TAU narratives reflected negative or neutral  
51  
52 trajectories; participants continued to experience numerous challenges related to housing,  
53  
54  
55  
56  
57  
58  
59  
60

1  
2  
3 health, substance use, trauma, and marginalization that culminated in increasingly poor  
4  
5 functioning and feelings of hopelessness.  
6  
7

8  
9 Positive change was primarily related to obtaining good quality housing.<sup>33</sup> The  
10 sense of security and positive self-worth resulting from good-quality, stable housing  
11 allowed individuals to explore new daily routines, reduce substance use and antisocial  
12 behaviour, expand social roles and networks, and provided a safe space to reflect on  
13 one's experiences. The breadth of domains affected by stable housing supports the  
14 construct of ontological security - the psychosocial sense of safety and stability which  
15 often accompanies permanent housing.<sup>31,34</sup> Past research has shown that homeless adults  
16 with mental illness who receive HF manifest greater ontological security than those living  
17 in transitional housing.<sup>31</sup> Our findings support a life course approach to recovery from  
18 homelessness and mental illness which considers the complex effects of cumulative  
19 adversity. The safety, security and ideological construct of 'home' is a critical  
20 foundation upon which the recovery journey is based.<sup>31</sup>  
21  
22  
23  
24  
25  
26  
27  
28  
29  
30  
31  
32  
33  
34  
35  
36  
37

38 Negative, neutral, and mixed trajectories were characterized by continued  
39 hardship and heavy substance use, perceived failures and disappointments, loss, and  
40 social isolation. These struggles resulted in a pervasive sense of social devaluation and  
41 helplessness, as described in previous analysis of the baseline interviews.<sup>32</sup> Trauma  
42 theory and research may provide a useful lens through which to view and understand the  
43 experience of and attempts to exit homelessness in at least three respects.<sup>35</sup> First,  
44 becoming homeless (and repeatedly thereafter) may itself produce symptoms of trauma.  
45 Second, the ongoing experience of homelessness (loss of safety, predictability, control)  
46 may erode coping abilities. Finally, homelessness may exacerbate trauma symptoms  
47  
48  
49  
50  
51  
52  
53  
54  
55  
56  
57  
58  
59  
60

1  
2  
3 among people with preexisting histories of victimization. In our narratives, cumulative  
4 trauma and adversity was often the common factor underlying barriers to recovery such  
5 as psychiatric symptoms, substance abuse, and social isolation.  
6  
7  
8  
9

10  
11  
12 Similar to prior qualitative research, mental illness was not a dominant theme in  
13 our narratives despite direct questions on the topic.<sup>21,33</sup> Psychiatric symptoms and related  
14 stigma were a source of distress and impairment for most participants; however, it was  
15 often hard to disentangle the effects of cumulative adversity, substance abuse and mental  
16 illness. Most participants had experienced repeated, longstanding trauma and  
17 marginalization, resulting in a level of disorganization that does not fit traditional  
18 diagnostic classification systems. For many participants, heavy substance use started in  
19 early adolescence and continued into adulthood as means of coping with trauma,  
20 homelessness, psychological distress, and as a way to “fit in.” Participants with long  
21 histories of homelessness and substance dependence tended to be more entrenched in the  
22 homeless identity and subculture, and had more difficulty adjusting to housing.<sup>21,33</sup> A  
23 better understanding of the timing, sequence and context for changes in complex  
24 trajectories of recovery, including homelessness, mental illness, and substance use, is still  
25 needed.  
26  
27  
28  
29  
30  
31  
32  
33  
34  
35  
36  
37  
38  
39  
40  
41  
42  
43  
44  
45

46 Isolation was a barrier to recovery for many participants, including those who  
47 received HF. The structural and individual factors that contributed to homelessness (i.e.,  
48 poverty and lack of resources, poor mental and physical health, poor coping skills, lack of  
49 meaningful activities) continued to impact all participants’ daily lives.<sup>1</sup> Henwood et al.  
50 suggest that past trauma may lead individuals to view the world as dangerous and  
51  
52  
53  
54  
55  
56  
57  
58  
59  
60

1  
2  
3 unpredictable, thus leading some people to seek the perceived comfort of isolating in an  
4 apartment.<sup>34</sup> This isolation could be a necessary consolidation phase before more  
5  
6 substantial recovery can occur.<sup>21</sup> In our narratives, isolation was often a longstanding  
7  
8 way of being; however, participants also had few opportunities to develop new daily  
9  
10 routines from which to develop a sense of well-being and identity.<sup>15</sup> Some participants  
11  
12 alluded to tradeoffs between the safety of cohesive social ties and the flexibility of weak  
13  
14 ties. It should also be noted that social isolation is a broader societal issue that is widely  
15  
16 prevalent. While isolation is clearly heightened among marginalized populations, it is  
17  
18 interesting that very few participants in our study who received HF left to return to their  
19  
20 old neighbourhoods.  
21  
22  
23  
24  
25  
26  
27  
28  
29  
30  
31  
32

33 Our 18-month follow-up period provided most participants with only initial  
34  
35 opportunities for recovery. Many participants who demonstrated positive trajectories had  
36  
37 experienced either an eviction or a planned move from their original housing placement.  
38  
39 Improvements in domains such as substance use, mental illness, and social support were  
40  
41 often very fragile. Our findings highlight the importance of supporting homeless people  
42  
43 with mental disorders through stages of change that include relapse, eviction and re-  
44  
45 housing. Oftentimes, in hindsight, these moves and the support received from service  
46  
47 teams were significant turning points and learning experiences for participants.  
48  
49 Narratives across all trajectory groups revealed that recovery and reclaiming stability in  
50  
51 housing and health, among other domains, is very difficult work -- slips and relapses are  
52  
53 common. Collectively, the narratives highlight the tremendous challenge for people to  
54  
55  
56  
57  
58  
59  
60

1  
2  
3 move indoors and into community after years and sometimes decades outside, and often  
4  
5 longer as marginalized citizens.  
6  
7

8  
9 For our participants, recovery requires attention to the consequences of cumulative  
10  
11 adversity, particularly previous trauma, and the ongoing stressors of poverty and social  
12  
13 isolation. Our findings revealed that progress in recovery reflected the stages of change  
14  
15 model.<sup>36</sup> change was gradual and cumulative, setbacks were often sudden and  
16  
17 devastating, and maintaining gains often meant being ‘stuck’ with few options for  
18  
19 positive change. Rather than a clinical approach to recovery, a whole-person approach  
20  
21 that takes into account experiences of cumulative trauma, marginalization, and individual  
22  
23 beliefs and expectations around change is needed.<sup>33</sup>  
24  
25  
26  
27  
28  
29  
30

### 31 ***Limitations***

32  
33 The narratives in this study were affected by participants’ recent circumstances;  
34  
35 however, our analysis relied on two different time points and also incorporated field  
36  
37 notes. Classifying trajectories is challenging given the volatility and multidimensionality  
38  
39 of people’s lives.<sup>21</sup> Neutral and mixed trajectories were inherently more variable than  
40  
41 positive and negative trajectories. For example, neutral trajectories could reflect a  
42  
43 continued negative path or a continued pattern of positive and negative (mixed)  
44  
45 experiences. Mixed trajectories were often reflective of a tumultuous pattern of positive  
46  
47 and negative experiences that could not be clearly categorized as positive or negative.  
48  
49 However, each category contained exemplar cases which were easier to code and other  
50  
51 cases (about one-quarter) that were more complex. Coding complex cases requires a  
52  
53 collaborative consensus-based approach.<sup>24</sup> Finally, given the qualitative and exploratory  
54  
55  
56  
57  
58  
59  
60

1  
2  
3 nature of this research, we caution against conclusions based on the type of HF received  
4  
5 (independent vs. congregate housing) or comparisons of HF and TAU as the sample sizes  
6  
7 within different housing types are small.  
8  
9

### 10 11 *Future Directions* 12

13  
14 Future qualitative research should examine the trajectories and themes identified  
15  
16 in our study in more detail and over longer periods of time. For example, we found the  
17  
18 expansion or contraction of social roles greatly affected participants' identities, and  
19  
20 positive shifts in identity were facilitated by HF. However, this shift appeared more  
21  
22 difficult for those who were invested in a homeless lifestyle. The process of establishing  
23  
24 a new sense of self and a sense of belonging among different requires more investigation.  
25  
26  
27

28  
29 Our analysis demonstrates that many homeless adults with mental illness who  
30  
31 receive good quality, stable housing with intensive supports (Housing First) are able to  
32  
33 make significant positive change over 18 months. The sense of security and confidence  
34  
35 related to stable housing is critical for supporting recovery across a variety of life  
36  
37 domains. However, systemic changes at broader socio-political levels are also need to  
38  
39 address issues related to poverty and homelessness.<sup>13,15</sup> Social change is needed to create  
40  
41 opportunities for marginalized people to be included in communities and to confront  
42  
43 poverty and social inequity.<sup>32</sup>  
44  
45  
46  
47  
48  
49  
50  
51  
52  
53  
54  
55  
56  
57  
58  
59  
60



## Acknowledgements

Thanks to Nancy Laliberte, Allison Laing, Arianna Kennedy, and Melinda Markey who conducted the interviews with participants; and Verena Strehlau, Sindi Addorisio, Bernd Mueller, Bijan Nassiri and Jeff Lawlor who helped locate participants. The authors also thank the At Home/Chez Soi Project collaborative at national and local levels. We reserve particular thanks to the women and men who participated in our study, and who provided us with details of their lives and experiences.

## Funding

Funded by the Mental Health Commission of Canada; Health Canada. The views expressed herein solely represent the authors.

## Author Contributions

MP drafted the manuscript, oversaw implementation of the interviews, and coded all the interviews. SR, LC and JS coded subsets of the interviews. SR transcribed all the interviews. JS was the principal investigator. All authors contributed to the final manuscript.

## Data sharing

Qualitative data can be accessed by contacting the Principal Investigator, Dr. Julian Somers at [jsomers@sfu.ca](mailto:jsomers@sfu.ca)

## Competing Interests

None

## References

- 1 Draine J, Salzer MS, Culhane DP, *et al.* Role of Social Disadvantage in Crime, Joblessness, and Homelessness Among Persons With Serious Mental Illness. *Psychiatric Services* 2002;**53**:565–73.
- 2 Kertesz SG, Crouch K, Milby JB, *et al.* Housing first for homeless persons with active addiction: are we overreaching? *Milbank Q* 2009;**87**:495–534.
- 3 Tsemberis S, Eisenberg RF. Pathways to Housing: Supported Housing for Street-Dwelling Homeless Individuals With Psychiatric Disabilities. *Psychiatric Services* 2000;**51**:487–93.
- 4 Culhane DP, Metraux S, Hadley TR. The impact of supportive housing for homeless people with severe mental illness on the utilization of the public health, corrections, and emergency shelter systems: The New York-New York Initiative. *Housing Policy Debate* 2002;**13**:107–63.
- 5 Davis L, Fulginiti A, Kriegel L, *et al.* Deinstitutionalization? Where Have All the People Gone? *Curr Psychiatry Rep*; **14**:259–69.
- 6 Hopper K, Jost J, Hay T, *et al.* Homelessness, severe mental illness, and the institutional circuit. *Psychiatric Services* 1997;**48**:659–65.
- 7 Levitt AJ, Jost JJ, Mergl KA, *et al.* Impact of Chronically Street Homeless Tenants in Congregate Supportive Housing. *American Journal of Orthopsychiatry* 2012;**82**:413–20.
- 8 Gilmer TP, Stefancic A, Ettner SL, *et al.* Effect of Full-Service Partnerships on Homelessness, Use and Costs of Mental Health Services, and Quality of Life Among Adults With Serious Mental Illness Homelessness Services in Mentally Ill Adults. *Arch Gen Psychiatry* 2010;**67**:645–52.
- 9 Gulcur L, Stefancic A, Shinn M, *et al.* Housing, hospitalization, and cost outcomes for homeless individuals with psychiatric disabilities participating in continuum of care and housing first programmes. 2003;**13**:171–86.
- 10 Patterson ML, Moniruzzaman A, Palepu A, *et al.* Housing First improves subjective quality of life among homeless adults with mental illness: 12-month findings from a randomized controlled trial in Vancouver, British Columbia. *Social Psychiatry and Psychiatric Epidemiology* Published Online First: 2013. doi:10.1007/s00127-013-0719-6
- 11 Yanos PT, Felton BJ, Tsemberis S, *et al.* Exploring the role of housing type, neighborhood characteristics, and lifestyle factors in the community integration of formerly homeless persons diagnosed with mental illness. *J Ment Health* 2007;**16**:703–17.

- 12 Siegel C, Samuels J, Tang D-I, *et al.* Tenant Outcomes in Supported Housing and Community Residences in New York City. *Psychiatric Services* 2006;**57**:982–91.
- 13 Hooper K. *Reckoning With Homelessness*. Cornell University Press 2003.
- 14 Forchuk C, Ward-Griffin C, Csiernik R, *et al.* Surviving the tornado of mental illness: psychiatric survivors' experiences of getting, losing, and keeping housing. *Psychiatric Services* 2006;**57**:558–62.
- 15 McNaughton CC. Transitions through homelessness, substance use, and the effect of material marginalization and psychological trauma. *Drugs Edu Prev Pol* 2008;**15**:177–88.
- 16 Tyler KA, Johnson KA. Pathways in and out of substance use among homeless-emerging adults. *Journal of adolescent research* 2006.
- 17 Lipsky M. *Street-Level Bureaucracy: Dilemmas of The Individual In Public Services*. New York: : Russell Sage Foundation 1980.
- 18 Tischler V, Rademeyer A, Vostanis P. Mothers experiencing homelessness: mental health, support and social care needs. *Health Soc Care Community* 2006;**15**:246–53.
- 19 Kirkpatrick H, Byrne C. A narrative inquiry: moving on from homelessness for individuals with a major mental illness. *J Psychiatr Ment Health Nurs* 2009;**16**:68–75.
- 20 Nelson G, Clarke J, Febbraro A, *et al.* A narrative approach to the evaluation of supportive housing: stories of homeless people who have experienced serious mental illness. *Psychiatr Rehabil J* 2005;**29**:98–104.
- 21 Padgett DK, Henwood B, Abrams C, *et al.* Social relationships among persons who have experienced serious mental illness, substance abuse, and homelessness: Implications for recovery. *Am J Orthopsychiatry* 2008;**78**:333–9.
- 22 Fichter MM, Quadflieg N. Intervention effects of supplying homeless individuals with permanent housing: a 3-year prospective study. *Acta Psychiatr Scand* 2006;**113**:36–40.
- 23 Wong Y-LI, Hadley TR, Culhane DP, *et al.* Predicting staying in or leaving permanent supportive housing that serves homeless people with serious mental illness. *US Department of Housing & Urban Development* 2006.
- 24 Singer B, Ryff CD, Carr D, *et al.* Linking Life Histories and Mental Health: A Person-Centered Strategy. *Sociological Methodology* 1998;**28**:1–51.
- 25 Lewin S, Glenton C, Oxman AD. Use of qualitative methods alongside randomised controlled trials of complex healthcare interventions: methodological study. *BMJ* 2009;**339**:b3496–6.

- 1  
2  
3  
4  
5  
6  
7  
8  
9  
10  
11  
12  
13  
14  
15  
16  
17  
18  
19  
20  
21  
22  
23  
24  
25  
26  
27  
28  
29  
30  
31  
32  
33  
34  
35  
36  
37  
38  
39  
40  
41  
42  
43  
44  
45  
46  
47  
48  
49  
50  
51  
52  
53  
54  
55  
56  
57  
58  
59  
60
- 26 Macnaughton EL, Goering PN, Nelson GB. Exploring the Value of Mixed Methods Within the At Home/Chez Soi Housing First Project: A Strategy to Evaluate the Implementation of a Complex Population Health Intervention for People With Mental Illness Who Have Been Homeless. *Can J Public Health* 2012;**103**:eS57–eS63.
- 27 Goering PN, Streiner DL, Adair C, *et al*. The At Home/Chez Soi trial protocol: a pragmatic, multi-site, randomised controlled trial of a Housing First intervention for homeless individuals with mental illness in five Canadian cities. *BMJ Open* 2011;**1**:e000323–3.
- 28 Zabkiewicz DM, Patterson M, Somers JM, *et al*. The Vancouver At Home Study: Overview and Methods of a Housing First Trial Among Individuals Who are Homeless and Living with Mental Illness. *J Clin Trials* 2012.
- 29 Morse JM, Field PA. *Qualitative Research Methods for Health Professionals*. Sage Publications 1995.
- 30 Strauss AL. *Qualitative Analysis for Social Scientists*. Cambridge University Press 1987.
- 31 Padgett DK. There's no place like (a) home: Ontological security among persons with serious mental illness in the United States. *Social Science & Medicine* 2007;**64**:1925–36.
- 32 Patterson ML, Markey MA, Somers JM. Multiple Paths to Just Ends: Using Narrative Interviews and Timelines to Explore Health Equity and Homelessness. *International Journal of Qualitative Methods* 2012;**11**:132–51.
- 33 Padgett DK, Smith BT, Henwood BF, *et al*. Life course adversity in the lives of formerly homeless persons with serious mental illness: context and meaning. *Am J Orthopsychiatry* 2012;**82**:421–30.
- 34 Henwood BF, Hsu H-T, Dent D, *et al*. Transitioning from Homelessness: A “Fresh-Start” Event. *Journal of the Society for Social Work and Research* 2013;**4**. doi:10.5243/jsswr.2010.
- 35 Goodman LA, Saxe L, Harvey M. Homelessness as psychological trauma: Broadening perspectives. *American Psychologist* 1991;**46**:1219–25.
- 36 Prochaska JO, DiClemente CC. *Toward a comprehensive model of change*. Plenum Press 1986.

1  
2  
3  
4  
5  
6  
7  
8  
9  
10  
11  
12  
13  
14  
15  
16  
17  
18  
19  
20  
21  
22  
23  
24  
25  
26  
27  
28  
29  
30  
31  
32  
33  
34  
35  
36  
37  
38  
39  
40  
41  
42  
43  
44  
45  
46  
47  
48  
49  
50  
51  
52  
53  
54  
55  
56  
57  
58  
59  
60

For peer review only

**Table 1. Demographic characteristics at baseline for the original baseline sample (n=52) and those re-interviewed after 18-months (n=43)**

|                                            | Baseline         |    | 18M follow-up    |    |
|--------------------------------------------|------------------|----|------------------|----|
|                                            | Mean (years)     |    | Mean (years)     |    |
| Age (range, median)                        | 42 (21-66, 42.5) |    | 43 (21-66, 42.1) |    |
| Lifetime duration homeless (range, median) | 5.5 (0.2-33, 3)  |    | 5.9 (0.2-33, 4)  |    |
|                                            | n                | %  | n                | %  |
| Gender                                     |                  |    |                  |    |
| Male                                       | 28               | 54 | 25               | 58 |
| Female                                     | 21               | 40 | 16               | 37 |
| Transgender                                | 3                | 6  | 2                | 5  |
| Race/Ethnicity                             |                  |    |                  |    |
| White                                      | 31               | 60 | 26               | 61 |
| Aboriginal                                 | 12               | 23 | 10               | 23 |
| Mixed/Other                                | 9                | 18 | 7                | 16 |
| Housing Status                             |                  |    |                  |    |
| Absolutely homeless                        | 42               | 81 | 35               | 81 |
| Precariously housed                        | 10               | 19 | 8                | 19 |
| Marital Status                             |                  |    |                  |    |
| Single, never married                      | 31               | 60 | 27               | 63 |
| Divorced/separated/widowed                 | 18               | 35 | 15               | 35 |
| Married/common law/other                   | 3                | 6  | 1                | 2  |
| Have Children under 18 years               | 17               | 33 | 15               | 35 |
| Education                                  |                  |    |                  |    |
| Grade 8 or less                            | 10               | 20 | 10               | 23 |
| Incomplete high school                     | 21               | 40 | 20               | 47 |
| Completed high school                      | 21               | 40 | 13               | 30 |

|                                       |    |    |    |    |
|---------------------------------------|----|----|----|----|
| Mental Disorders                      |    |    |    |    |
| Psychotic Disorder                    | 25 | 48 | 21 | 49 |
| Major Depressive Episode              | 24 | 46 | 21 | 49 |
| Mood Disorder with Psychotic Features | 15 | 29 | 14 | 33 |
| Post-Traumatic Stress Disorder        | 15 | 29 | 12 | 28 |
| Panic Disorder                        | 14 | 27 | 10 | 23 |
| Manic or Hypomanic Episode            | 10 | 19 | 8  | 19 |
| Substance Dependence                  | 33 | 63 | 29 | 67 |
| Alcohol Dependence                    | 11 | 21 | 10 | 23 |

Table 2. Recovery trajectories over 18 months by study arm.

| Study Arm                      | Trajectory Type  |                 |                 |                 |
|--------------------------------|------------------|-----------------|-----------------|-----------------|
|                                | Positive         | Negative        | Mixed           | Neutral         |
| <b>ACT (n=9)</b>               | 6                | 0               | 3               | 0               |
| <b>CONG (n=10)</b>             | 5 <sup>+</sup>   | 0               | 3 <sup>#</sup>  | 2 <sup>^</sup>  |
| <b>HNTAU (n=7)</b>             | 0                | 2               | 1               | 4               |
| <b>ICM (n=9)</b>               | 6                | 0               | 3               | 0               |
| <b>MNTAU (n=8)</b>             | 3                | 3               | 1               | 1               |
| <b><i>HF Total (n=28)</i></b>  | <b><i>17</i></b> | <b><i>0</i></b> | <b><i>9</i></b> | <b><i>2</i></b> |
| <b><i>TAU Total (n=15)</i></b> | <b><i>3</i></b>  | <b><i>5</i></b> | <b><i>2</i></b> | <b><i>5</i></b> |

<sup>+</sup> Two participants left the CONG residence within the first year and were living in supported housing elsewhere.

<sup>#</sup> Two of these participants left the CONG residence within the first year, one of whom was living in supported housing elsewhere and one of whom was living in an SRO.

<sup>^</sup> One of these participants left the CONG residence within the first year and was living in an SRO.
